# Supplementary material for: Revised fractional abundances and warm-season temperatures substantially improve brGDGT calibrations in lake sediments
Source: Copernicus journal article supplement (doi:10.5194/bg-2021-16), 2021-01-28
Supplement: Supplementary file 1 [file bg-2021-16-supplement-version4.zip]

Archive with 3 entries (3 files):
- Raberg_supplement_pt1_R1.pdf
- supplement_pt2_R1.html
- supplemental_data.xlsx
