# Supplementary material for: Revised fractional abundances and warm-season temperatures substantially improve brGDGT calibrations in lake sediments
Source: Copernicus journal article supplement (doi:10.5194/bg-2021-16), 2021-01-28
Supplement: Supplementary file 1 [file bg-2021-16-supplement-version4.zip › supplement_pt2_R1.html]

 

 

 

 
 
 


 

 

 Supplemental Figures 

 
 
 
 
 
 
 
 
 
 
 
 
 
 
 
 
 

 

 
 


 


 

 

 
 


 


 

 


 


 
 
 
 
 
 

 


 

 
  Code     
 
  Show All Code  
  Hide All Code  
 
 


 Supplemental Figures 
 All structural (sub)set plots 
 Raberg et al. (2021) 
 19 Apr 2021 

 


 
 Setup code 
 Formatting functions 
  #&#39; Format number with significant digits
#&#39; @param signif number of significant digits
#&#39; @param sci_notation cutoff when to start using scientific notation
#&#39; @param sci_as_latex scientific notiation as latex
#&#39; @param include_plus whether to include plus sign
format_with_signif &lt;- function(x, signif = 2, sci_notation = 1e-5, sci_as_latex = FALSE, include_plus = FALSE) {
  if(signif &lt;= 0) stop(&quot;this function only supports numbers with at least 1 significant digit&quot;)
  x &lt;- base::signif(x, digits = signif)
  n_decimals = ifelse(x == 0, 0, log10(abs(x)))
  n_decimals = ifelse(
    n_decimals &lt; 0,
    -floor(n_decimals) + signif - 1L,
    -ceiling(n_decimals) + signif
  )
  plus &lt;- if(include_plus) &quot;+&quot; else &quot;&quot;
  pow &lt;- if(sci_as_latex) &quot;\\\\cdot{}10^{-%.0f}&quot; else &quot;e-%.0f&quot;
  ifelse(
    abs(x) &gt; sci_notation,
    sprintf(sprintf(&quot;%%%s.%0.ff&quot;, plus, n_decimals), x),
    sprintf(sprintf(&quot;%%%s.%0.ff%s&quot;, plus, signif - 1L, pow), 
            x * 10^(n_decimals - signif + 1L), (n_decimals - signif + 1L))
  )
}  
 Calc FAs functions 
  calculate_r2 &lt;- function(x, y) {
  lm(y ~ x, data = tibble(x = x, y = y)) %&gt;% broom::glance() %&gt;% pull(r.squared)
}

calculate_p_val &lt;- function(x, y) {
  lm(y ~ x, data = tibble(x = x, y = y)) %&gt;% broom::glance() %&gt;% pull(p.value)
}

calculate_FAs &lt;- function(df, parent_set_name, subset_name) {
  # names of parent set and subset. this is called when importing the schematic pdf
  df %&gt;% mutate(subset = !!subset_name,
                parent_set = !!parent_set_name) %&gt;% 
    # complete calculation. group_by here will determine which subsets are calculated
    group_by(sample_id, .add = T) %&gt;% # .add = T allows for original df grouping to be passed in here
    mutate(percentage = amount / sum(amount)) %&gt;% 
    ungroup() %&gt;% 
    # add model parameters
    group_by(methyl, cycle, pos) %&gt;% 
    # calculate and add r2 and p-value asterisk
    mutate(
      r2 = calculate_r2(x = temp, y = percentage),
      p_value = calculate_p_val(x = temp, y = percentage),
      p_value_star = if_else(p_value &gt;= 0.01, &quot;*&quot;, &quot;&quot;),
      full_temp_p_value_star = if_else(full_temp_p_value &gt;= 0.01, &quot;*&quot;, &quot;&quot;),
      label = sprintf(
        &quot;$\\textbf{%s}:\\,\\textit{R}^2 = %.2f%s\\,(\\textit{%.2f%s})$&quot;,
        compound, r2, p_value_star, full_temp_r2, full_temp_p_value_star
      )
    ) %&gt;% 
    ungroup() %&gt;% 
    arrange(cycle, methyl, pos)
}

# Same function as calculate_FAs but for conductivity
calculate_FAs_cond &lt;- function(df, parent_set_name, subset_name) {
  # names of parent set and subset. this is called when importing the schematic pdf
  df %&gt;% mutate(subset = !!subset_name,
                parent_set = !!parent_set_name) %&gt;% 
    # complete calculation. group_by here will determine which subsets are calculated
    group_by(sample_id, .add = T) %&gt;% # .add = T allows for original df grouping to be passed in here
    mutate(percentage = amount / sum(amount)) %&gt;% 
    ungroup() %&gt;% 
    # add model parameters
    group_by(methyl, cycle, pos) %&gt;% 
    mutate(
      r2 = calculate_r2(x = ln_conductivity, y = percentage),
      p_value = calculate_p_val(x = ln_conductivity, y = percentage),
      p_value_star = if_else(p_value &gt;= 0.01, &quot;*&quot;, &quot;&quot;),
      full_cond_p_value_star = if_else(full_cond_p_value &gt;= 0.01, &quot;*&quot;, &quot;&quot;),
      label = sprintf(
        &quot;$\\textbf{%s}:\\,\\textit{R}^2 = %.2f%s\\,(\\textit{%.2f%s})$&quot;,
        compound, r2, p_value_star, full_cond_r2, full_cond_p_value_star
      )
    ) %&gt;% 
    ungroup() %&gt;% 
    arrange(methyl, cycle, pos)
}

# Same function as calculate_FAs but for pH
calculate_FAs_pH &lt;- function(df, parent_set_name, subset_name) {
  df %&gt;% mutate(subset = !!subset_name,
                parent_set = !!parent_set_name) %&gt;% 
    # complete calculation. group_by here will determine which subsets are calculated
    group_by(sample_id, .add = T) %&gt;% # .add = T allows for original df grouping to be passed in here
    mutate(percentage = amount / sum(amount)) %&gt;% 
    ungroup() %&gt;% 
    # add model parameters
    group_by(methyl, cycle, pos) %&gt;% 
    mutate(
      r2 = calculate_r2(x = pH, y = percentage),
      p_value = calculate_p_val(x = pH, y = percentage),
      p_value_star = if_else(p_value &gt;= 0.01, &quot;*&quot;, &quot;&quot;),
      full_pH_p_value_star = if_else(full_pH_p_value &gt;= 0.01, &quot;*&quot;, &quot;&quot;),
      label = sprintf(
        &quot;$\\textbf{%s}:\\,\\textit{R}^2 = %.2f%s\\,(\\textit{%.2f%s})$&quot;,
        compound, r2, p_value_star, full_pH_r2, full_pH_p_value_star
      )
    ) %&gt;% 
    ungroup() %&gt;% 
    arrange(methyl, cycle, pos)
}

# Same function as calculate_FAs but for DO_mean
calculate_FAs_DO &lt;- function(df, parent_set_name, subset_name) {
  df %&gt;% mutate(subset = !!subset_name,
                parent_set = !!parent_set_name) %&gt;% 
    # complete calculation. group_by here will determine which subsets are calculated
    group_by(sample_id, .add = T) %&gt;% # .add = T allows for original df grouping to be passed in here
    mutate(percentage = amount / sum(amount)) %&gt;% 
    ungroup() %&gt;% 
    # add model parameters
    group_by(methyl, cycle, pos) %&gt;% 
    mutate(
      r2 = calculate_r2(x = DO, y = percentage),
      p_value = calculate_p_val(x = DO, y = percentage),
      p_value_star = if_else(p_value &gt;= 0.01, &quot;*&quot;, &quot;&quot;),
      full_DO_p_value_star = if_else(full_DO_p_value &gt;= 0.01, &quot;*&quot;, &quot;&quot;),
      label = sprintf(
        &quot;$\\textbf{%s}:\\,\\textit{R}^2 = %.2f%s\\,(\\textit{%.2f%s})$&quot;,
        compound, r2, p_value_star, full_DO_r2, full_DO_p_value_star
      )
    ) %&gt;% 
    ungroup() %&gt;% 
    arrange(methyl, cycle, pos)
}  
 Color schemes 
  # Note that many of these are reduntant since I decided to use the same colors, but they&#39;re coded in for the flexibility

grp_colors &lt;- 
  tribble(
    ~col_grp,  ~color,
    # meth
    &quot;meth_a_5me&quot;,             &quot;#AADFF1&quot;,
    &quot;meth_a_6me&quot;,             &quot;#AADFF1&quot;,
    &quot;meth_a_5me_noI&quot;,         &quot;#AADFF1&quot;,
    &quot;meth_a_6me_noI&quot;,         &quot;#AADFF1&quot;,
    &quot;meth_a_both_noI&quot;,        &quot;#AADFF1&quot;,
    &quot;meth_a_both&quot;,            &quot;#AADFF1&quot;,
    &quot;meth_b_5me&quot;,             &quot;#9B85BE&quot;,
    &quot;meth_b_6me&quot;,             &quot;#9B85BE&quot;,
    &quot;meth_b_5me_noI&quot;,         &quot;#9B85BE&quot;,
    &quot;meth_b_6me_noI&quot;,         &quot;#9B85BE&quot;,
    &quot;meth_b_both_noI&quot;,        &quot;#9B85BE&quot;,
    &quot;meth_b_both&quot;,            &quot;#9B85BE&quot;,
    &quot;meth_c_5me&quot;,             &quot;#80CAA5&quot;,
    &quot;meth_c_6me&quot;,             &quot;#80CAA5&quot;,
    &quot;meth_c_5me_noI&quot;,         &quot;#80CAA5&quot;,
    &quot;meth_c_6me_noI&quot;,         &quot;#80CAA5&quot;,
    &quot;meth_c_both_noI&quot;,        &quot;#80CAA5&quot;,
    &quot;meth_c_both&quot;,            &quot;#80CAA5&quot;,
    # cyc
    &quot;cyc_I_5me&quot;,     &quot;#FCEC98&quot;,
    &quot;cyc_I_6me&quot;,     &quot;#FCEC98&quot;,
    &quot;cyc_I_both&quot;,    &quot;#FCEC98&quot;,
    &quot;cyc_II_5me&quot;,    &quot;#F59DB2&quot;,
    &quot;cyc_II_6me&quot;,    &quot;#F59DB2&quot;,
    &quot;cyc_II_both&quot;,   &quot;#F59DB2&quot;,
    &quot;cyc_III_5me&quot;,   &quot;#FBB57F&quot;,
    &quot;cyc_III_6me&quot;,   &quot;#FBB57F&quot;,
    &quot;cyc_III_both&quot;,  &quot;#FBB57F&quot;,
    # isom
    &quot;isom_a&quot;,        &quot;#A7A9AC&quot;,
    &quot;isom_b&quot;,        &quot;#A7A9AC&quot;,
    &quot;isom_c&quot;,        &quot;#A7A9AC&quot;,
    # combined
    &quot;mi_a&quot;,          &quot;#7D93AA&quot;,
    &quot;mi_b&quot;,          &quot;#8677A6&quot;,
    &quot;mi_c&quot;,          &quot;#929D79&quot;,
    &quot;ci_I&quot;,          &quot;#E8D9A9&quot;,
    &quot;ci_II&quot;,         &quot;#BD6477&quot;,
    &quot;ci_III&quot;,        &quot;#E18256&quot;,
    &quot;mc_5me&quot;,          &quot;#67ADA9&quot;,
    &quot;mc_5me_noI&quot;,      &quot;#67ADA9&quot;,
    &quot;mc_6me&quot;,          &quot;#67ADA9&quot;,
    &quot;mc_6me_noI&quot;,      &quot;#67ADA9&quot;,
    &quot;full&quot;,          &quot;#D5C7C1&quot;
  )  
 Base Plots 
  # parent sets: meth, cyc, isom, mi, ci, mc, full
# subsets: me and cy - 5me, 6me, both
# col_grp will end up being meth_a_5me

# data base plot
base_plot &lt;- 
  ggplot() +
  # patterned background
  geom_rect_pattern(
    data = function(df) {
      df %&gt;%
        select(panel, compound, methyl, pos, cycle, parent_set, subset) %&gt;%
        unique() %&gt;%
        mutate(col_grp = case_when(parent_set == &quot;meth&quot; ~ paste(parent_set, cycle, subset, sep = &quot;_&quot;),
                                   parent_set == &quot;cyc&quot; ~ paste(parent_set, methyl, subset, sep = &quot;_&quot;),
                                   parent_set == &quot;isom&quot; ~ paste(parent_set, cycle, sep = &quot;_&quot;),
                                   parent_set == &quot;mi&quot; ~ paste(parent_set, cycle, sep = &quot;_&quot;),
                                   parent_set == &quot;ci&quot; ~ paste(parent_set, methyl, sep = &quot;_&quot;),
                                   parent_set == &quot;mc&quot; ~ paste(parent_set, subset, sep = &quot;_&quot;),
                                   parent_set == &quot;full&quot; ~ &quot;full&quot;),
               pattern = if_else(parent_set %in% c(&quot;meth&quot;, &quot;cyc&quot;, &quot;mc&quot;) &amp; pos == 6 |
                                   parent_set == &quot;isom&quot; &amp; methyl == &quot;III&quot;, &quot;yes&quot;, &quot;no&quot;)
               ) %&gt;%
        left_join(grp_colors, by = &quot;col_grp&quot;)
    },
    mapping = aes(
      xmin = -Inf, xmax = Inf, ymin = -Inf, ymax = Inf,
      fill = color,
      pattern_fill = color,
      pattern_density = pattern
    ),
    # no pattern borders, just the stripes
    pattern_linetype = 0,
    # orientation of the stripes
    pattern_angle = 44.99, # 45 didn&#39;t work for some reason...
    # change to &quot;crosshatch&quot; if that looks better
    pattern = &quot;stripe&quot;,
    # play with the alphas for relative intensity of the stripes
    pattern_alpha = 0.2,
    alpha = 0.2,
    show.legend = FALSE
  ) +
  scale_pattern_fill_identity() + 
  scale_pattern_density_manual(values = c(no = 0, yes = 0.5)) +
  # data
  geom_point(
    mapping = aes(x = env_var, y = percentage, shape = source, color = source)
  ) +
  scale_fill_identity() +
  theme(
    text = element_text(size = 16),
    panel.grid = element_blank(),
    strip.background = element_blank(),
    strip.text = element_blank(),
    legend.position = &quot;bottom&quot;,
    legend.direction = &quot;horizontal&quot;
  ) +
  # corner labels, a, b, c, d, etc.
  geom_text(
    data = function(df) df %&gt;% mutate(panel_nr = as.numeric(panel), panel_letter = paste0(letters[panel_nr],&quot;)&quot;)) %&gt;% 
      select(panel, panel_letter, compound, methyl, pos, cycle, label) %&gt;% unique(),
    mapping = aes(label = panel_letter, 
                  x = -Inf, y = Inf, hjust = -0.4, vjust = 1.5), parse = FALSE #x = -Inf, y = +Inf, hjust = 1.5, vjust = 1.5
  ) +
  labs(x = &quot;Temperature&quot;, y = &quot;Fractional Abundance within each group&quot;, shape = NULL, color = NULL)

#&#39; function to create image row
#&#39; @param y_width y axis relative width
create_image_row &lt;- function(df, y_width) {
  stopifnot(!missing(df))
  stopifnot(!missing(y_width))
  imgs &lt;-
    df %&gt;% 
    with(case_when(parent_set == &quot;meth&quot; ~ file.path(imgs_folder, sprintf(&quot;meth_%s_%s.pdf&quot;, cycle, subset)),
                   parent_set == &quot;cyc&quot; ~ file.path(imgs_folder, sprintf(&quot;cyc_%s_%s.pdf&quot;, methyl, subset)),
                   parent_set == &quot;isom&quot; ~ file.path(imgs_folder, sprintf(&quot;isom_%s.pdf&quot;, cycle)),
                   parent_set == &quot;mi&quot; ~ file.path(imgs_folder, sprintf(&quot;mi_%s.pdf&quot;, cycle)),
                   parent_set == &quot;ci&quot; ~ file.path(imgs_folder, sprintf(&quot;ci_%s.pdf&quot;, methyl)),
                   parent_set == &quot;mc&quot; ~ file.path(imgs_folder, sprintf(&quot;mc_%s.pdf&quot;, subset)),
                   parent_set == &quot;full&quot; ~ file.path(imgs_folder, sprintf(&quot;full.pdf&quot;)))
         ) %&gt;%
    unique() %&gt;% 
    map(magick::image_read_pdf)
  img_plots &lt;- imgs %&gt;% map(~cowplot::ggdraw() + cowplot::draw_image(.x))
  do.call(
    plot_grid,
    c(
      list(ggdraw()), img_plots, 
      list(
        nrow = 1L,
        rel_widths = c(y_width, rep((1-y_width)/length(imgs), length(imgs)))
      )
    )
  )
}

#&#39; function to create image row with free y-axes
#&#39; @param y_width DEPRECATED
#&#39; @param y_axis_label_width y axis label width
#&#39; @param y_axes_width y axes relative width
create_image_row_2 &lt;- function(df, y_width, y_axis_label_width = y_width/2, y_axes_width = y_width/2) {
  stopifnot(!missing(df))
  imgs &lt;-
    df %&gt;% 
    with(case_when(parent_set == &quot;meth&quot; ~ file.path(imgs_folder, sprintf(&quot;meth_%s_%s.pdf&quot;, cycle, subset)),
                   parent_set == &quot;cyc&quot; ~ file.path(imgs_folder, sprintf(&quot;cyc_%s_%s.pdf&quot;, methyl, subset)),
                   parent_set == &quot;isom&quot; ~ file.path(imgs_folder, sprintf(&quot;isom_%s.pdf&quot;, cycle)),
                   parent_set == &quot;mi&quot; ~ file.path(imgs_folder, sprintf(&quot;mi_%s.pdf&quot;, cycle)),
                   parent_set == &quot;ci&quot; ~ file.path(imgs_folder, sprintf(&quot;ci_%s.pdf&quot;, methyl)),
                   parent_set == &quot;mc&quot; ~ file.path(imgs_folder, sprintf(&quot;mc_%s.pdf&quot;, subset)),
                   parent_set == &quot;full&quot; ~ file.path(imgs_folder, sprintf(&quot;full.pdf&quot;)))
         ) %&gt;%
    unique() %&gt;% 
    map(magick::image_read_pdf)
  n_imgs &lt;- length(imgs)
  img_plots &lt;- imgs %&gt;% map(~cowplot::ggdraw() + cowplot::draw_image(.x))
  img_plots_w_empties &lt;- map(img_plots, ~c(list(cowplot::ggdraw()), list(.x))) %&gt;% unlist(recursive = FALSE, use.names = FALSE)
  rel_widths &lt;- c(y_axis_label_width, rep(c(y_axes_width, (1 - y_axis_label_width - n_imgs * y_axes_width) / n_imgs), times = n_imgs))
  do.call(
    plot_grid,
    c(list(cowplot::ggdraw()), img_plots_w_empties, list(nrow = 1L, rel_widths = rel_widths))
  )
}

#&#39; function to create image row
#&#39; @param y_width DEPRECATED
#&#39; @param y_axis_label_width y axis label width
#&#39; @param y_axes_width y axes relative width
create_image_row_adjust &lt;- function(df, y_width, y_axis_label_width = y_width/2, y_axes_width = y_width/2) {
  stopifnot(!missing(df))
  imgs &lt;-
    df %&gt;% 
    with(case_when(parent_set == &quot;meth&quot; ~ file.path(imgs_folder, sprintf(&quot;meth_%s_%s.pdf&quot;, cycle, subset)),
                   parent_set == &quot;cyc&quot; ~ file.path(imgs_folder, sprintf(&quot;cyc_%s_%s.pdf&quot;, methyl, subset)),
                   parent_set == &quot;isom&quot; ~ file.path(imgs_folder, sprintf(&quot;isom_%s.pdf&quot;, cycle)),
                   parent_set == &quot;mi&quot; ~ file.path(imgs_folder, sprintf(&quot;mi_%s.pdf&quot;, cycle)),
                   parent_set == &quot;ci&quot; ~ file.path(imgs_folder, sprintf(&quot;ci_%s.pdf&quot;, methyl)),
                   parent_set == &quot;mc&quot; ~ file.path(imgs_folder, sprintf(&quot;mc_%s.pdf&quot;, subset)),
                   parent_set == &quot;full&quot; ~ file.path(imgs_folder, sprintf(&quot;full.pdf&quot;)))
         ) %&gt;% 
    unique() %&gt;% 
    map(magick::image_read_pdf)
  n_imgs &lt;- length(imgs)
  img_plots &lt;- imgs %&gt;% map(~cowplot::ggdraw() + cowplot::draw_image(.x))
  img_plots_w_empties &lt;- map(img_plots, ~c(list(cowplot::ggdraw() + theme(panel.background = element_rect(fill = &quot;black&quot;))), list(.x))) %&gt;% unlist(recursive = FALSE, use.names = FALSE)
  rel_widths &lt;- c(y_axis_label_width, rep(c(y_axes_width, (1 - y_axis_label_width - n_imgs * y_axes_width) / n_imgs), times = n_imgs))
  do.call(
    plot_grid,
    c(list(cowplot::ggdraw() + theme(panel.background = element_rect(fill = &quot;red&quot;))), img_plots_w_empties, list(nrow = 1L, rel_widths = rel_widths))
  )
}

#&#39; function to create image col
#&#39; @param y_height y axis relative height
create_image_col &lt;- function(df, y_height, rel_heights = 1) {
  stopifnot(!missing(df))
  stopifnot(!missing(y_height))
  imgs &lt;-
    df %&gt;% 
    with(case_when(parent_set == &quot;meth&quot; ~ file.path(imgs_folder, sprintf(&quot;meth_%s_%s.pdf&quot;, cycle, subset)),
                   parent_set == &quot;cyc&quot; ~ file.path(imgs_folder, sprintf(&quot;cyc_%s_%s.pdf&quot;, methyl, subset)),
                   parent_set == &quot;isom&quot; ~ file.path(imgs_folder, sprintf(&quot;isom_%s.pdf&quot;, cycle)),
                   parent_set == &quot;mi&quot; ~ file.path(imgs_folder, sprintf(&quot;mi_%s.pdf&quot;, cycle)),
                   parent_set == &quot;ci&quot; ~ file.path(imgs_folder, sprintf(&quot;ci_%s.pdf&quot;, methyl)),
                   parent_set == &quot;mc&quot; ~ file.path(imgs_folder, sprintf(&quot;mc_%s.pdf&quot;, subset)),
                   parent_set == &quot;full&quot; ~ file.path(imgs_folder, sprintf(&quot;full.pdf&quot;)))
         ) %&gt;%
    unique() %&gt;% 
    map(magick::image_read_pdf)
  img_plots &lt;- imgs %&gt;% map(~cowplot::ggdraw() + cowplot::draw_image(.x))
  do.call(
    plot_grid,
    c(
      img_plots, list(ggdraw()), 
      list(
        ncol = 1L,
        rel_heights = c(rep((1-y_height)/length(imgs) * rel_heights/sum(rel_heights), length(imgs)), y_height)
      )
    )
  )
}  
 Import data 
  # Read and parse
ss_data_6meIs &lt;- readxl::read_xlsx(&quot;../calibrations/outputs/comb_data_ss_avgs.xlsx&quot;) %&gt;% 
  select(Sample_name, Region, M_above0_air, pH_mean, ln_conductivity, DO_mgperL_mean, ends_with(&quot;full&quot;), -total_full) %&gt;%
  # # add a &quot;6me&quot; version of the I&#39;s
  mutate(fIa_prime_sub_full = fIa_sub_full,
         fIb_prime_sub_full = fIb_sub_full,
         fIc_prime_sub_full = fIc_sub_full) %&gt;%
  pivot_longer(ends_with(&quot;full&quot;), names_to = &quot;compound&quot;, values_to = &quot;amount&quot;) %&gt;% #***
  mutate(compound = str_remove(compound, &quot;_sub_full&quot;) %&gt;% str_remove(&quot;f&quot;),
         compound = if_else(str_detect(compound, &quot;prime&quot;), str_replace(compound, &quot;_prime&quot;, &quot;&#39;&quot;), compound),
         methyl = case_when(str_detect(compound, &quot;III&quot;) ~ &quot;III&quot;,
                            str_detect(compound, &quot;II&quot;) ~ &quot;II&quot;,
                            str_detect(compound, &quot;I&quot;) ~ &quot;I&quot;),
         cycle = case_when(str_detect(compound, &quot;a&quot;) ~ &quot;a&quot;,
                           str_detect(compound, &quot;b&quot;) ~ &quot;b&quot;,
                           str_detect(compound, &quot;c&quot;) ~ &quot;c&quot;),
         pos = if_else(str_detect(compound, &quot;&#39;&quot;), &quot;6&quot;, &quot;5&quot;),
         Region2 = case_when(Region == &quot;Baffin&quot; ~ &quot;Canada&quot;,
                             Region == &quot;Switzerland&quot; ~ &quot;Central Europe&quot;,
                             T ~ Region)
         ) %&gt;% 
  rename(sample_id = &quot;Sample_name&quot;,
         source = &quot;Region2&quot;,
         temp = &quot;M_above0_air&quot;,
         pH = &quot;pH_mean&quot;,
         DO = &quot;DO_mgperL_mean&quot;) %&gt;% 
  # renomarlize just in case
  group_by(sample_id) %&gt;% 
  mutate(percentage = amount / sum(amount)) %&gt;% 
  ungroup() %&gt;% 
  # add Full r2 and p
  group_by(methyl, cycle, pos) %&gt;% 
  mutate(
    full_temp_r2 = calculate_r2(x = temp, y = amount),
    full_temp_p_value = calculate_p_val(x = temp, y = amount),
    full_pH_r2 = calculate_r2(x = pH, y = amount),
    full_pH_p_value = calculate_p_val(x = pH, y = amount),
    full_cond_r2 = calculate_r2(x = ln_conductivity, y = amount),
    full_cond_p_value = calculate_p_val(x = ln_conductivity, y = amount),
    full_DO_r2 = calculate_r2(x = DO, y = amount),
    full_DO_p_value = calculate_p_val(x = DO, y = amount),
    panel = compound,
    source = fct_relevel(source, &quot;Africa&quot;, &quot;Canada&quot;, &quot;China&quot;, &quot;Iceland&quot;, &quot;Central Europe&quot;)
    ) %&gt;% 
  ungroup()

# remove the 6-methyl I&#39;s. this is the default dataframe to use, just easier to define the other one first.
ss_data &lt;- ss_data_6meIs %&gt;% 
  filter(!(methyl == &quot;I&quot; &amp; pos == &quot;6&quot;))  
 Dataset statistics 
  ss_data %&gt;% 
  select(pH, temp, DO, ln_conductivity)  
 
 
 
 Generate Temperature subsets 
  # Used in selecting the schematic and the background color:
# Valid parent_set_names = &quot;meth&quot;, &quot;cyc&quot;, &quot;isom&quot;, &quot;mi&quot;, &quot;ci&quot;, &quot;mc&quot;, &quot;full&quot;. 
# Valid subset_names = &quot;both&quot;, &quot;5me&quot;, &quot;6me&quot;, &quot;5me_noI&quot;, &quot;6me_noI&quot;, only used for the meth, cyc, and mc parent sets

# Combined sets

ss_data_full &lt;- ss_data %&gt;% 
  filter() %&gt;% # filter only data you want to include in FAs
  group_by(NULL) %&gt;% # grouping for calculating FAs
  calculate_FAs(parent_set_name = &quot;full&quot;, subset_name = &quot;&quot;) # names of parent set and subset. this is called when importing the schematic pdf and choosing the plot color

ss_data_mc_5me &lt;- ss_data %&gt;% 
  filter(methyl == &quot;I&quot; | pos == &quot;5&quot;) %&gt;%
  group_by(NULL) %&gt;% 
  calculate_FAs(&quot;mc&quot;, &quot;5me&quot;)

ss_data_mc_6me_noI &lt;- ss_data %&gt;% 
  filter(pos == &quot;6&quot;) %&gt;%
  group_by(NULL) %&gt;% 
  calculate_FAs(&quot;mc&quot;, &quot;6me_noI&quot;)

ss_data_mc_6me &lt;- ss_data %&gt;% 
  filter(methyl == &quot;I&quot; | pos == &quot;6&quot;) %&gt;%
  group_by(NULL) %&gt;% 
  calculate_FAs(&quot;mc&quot;, &quot;6me&quot;)

ss_data_mc_5me_noI &lt;- ss_data %&gt;% 
  filter(pos == &quot;5&quot; &amp; methyl != &quot;I&quot;) %&gt;%
  group_by(NULL) %&gt;% 
  calculate_FAs(&quot;mc&quot;, &quot;5me_noI&quot;)

ss_data_mc &lt;- ss_data_mc_5me %&gt;% 
  bind_rows(ss_data_mc_6me_noI)

ss_data_ci &lt;- ss_data %&gt;% 
  group_by(methyl) %&gt;% 
  calculate_FAs(&quot;ci&quot;, &quot;&quot;)

ss_data_mi &lt;- ss_data %&gt;% 
  group_by(cycle) %&gt;% 
  calculate_FAs(&quot;mi&quot;, &quot;&quot;)


# Methylation sets

ss_data_meth_5me &lt;- ss_data %&gt;% 
  filter(methyl == &quot;I&quot; | pos == &quot;5&quot;) %&gt;% 
  group_by(cycle) %&gt;% 
  calculate_FAs(&quot;meth&quot;, &quot;5me&quot;) 

ss_data_meth_6me &lt;- ss_data %&gt;%
  filter(methyl == &quot;I&quot; | pos == &quot;6&quot;) %&gt;%
  group_by(cycle) %&gt;%
  calculate_FAs(&quot;meth&quot;, &quot;6me&quot;)

ss_data_meth_6me_noI &lt;- ss_data %&gt;% # bind_rows with ss_data_meth_5me to generate meth
  filter(pos == &quot;6&quot;) %&gt;%
  group_by(cycle) %&gt;%
  calculate_FAs(&quot;meth&quot;, &quot;6me&quot;)

ss_data_meth_5me_noI &lt;- ss_data %&gt;%
  filter(pos == &quot;5&quot;, methyl != &quot;I&quot;) %&gt;%
  group_by(cycle) %&gt;%
  calculate_FAs(&quot;meth&quot;, &quot;5me&quot;)

ss_data_meth &lt;- ss_data_meth_6me_noI %&gt;%
  filter(methyl == &quot;III&quot;) %&gt;% # only plot either II or III since they&#39;re redundant
  bind_rows(ss_data_meth_5me) %&gt;% 
  mutate(subset = &quot;both&quot;)


# Cyclization sets

ss_data_cyc_5me &lt;- ss_data %&gt;%
  filter(methyl == &quot;I&quot; | pos == &quot;5&quot;) %&gt;%
  group_by(methyl) %&gt;%
  calculate_FAs(&quot;cyc&quot;, &quot;5me&quot;)

ss_data_cyc_6me &lt;- ss_data %&gt;%
  filter(methyl == &quot;I&quot; | pos == &quot;6&quot;) %&gt;%
  group_by(methyl) %&gt;%
  calculate_FAs(&quot;cyc&quot;, &quot;6me&quot;)

ss_data_cyc &lt;- ss_data_cyc_5me %&gt;% 
  bind_rows(ss_data_cyc_6me %&gt;% filter(methyl != &quot;I&quot;)) %&gt;% 
  mutate(subset = &quot;both&quot;)


# Isomer sets

ss_data_isom &lt;- ss_data %&gt;%
  filter(methyl != &quot;I&quot;) %&gt;%
  group_by(methyl, cycle) %&gt;%
  calculate_FAs(&quot;isom&quot;, &quot;&quot;) %&gt;%
  filter(pos == &quot;6&quot;) # just pick 5 or 6 since they&#39;re redundant  
 Generate Conductivity subsets 
  # Used in selecting the schematic:
# Valid parent_set_names = &quot;meth&quot;, &quot;cyc&quot;, &quot;isom&quot;, &quot;mi&quot;, &quot;ci&quot;, &quot;mc&quot;, &quot;full&quot;. 
# Valid subset_names = &quot;both&quot;, &quot;5me&quot;, &quot;6me&quot;, &quot;5me_noI&quot;, &quot;6me_noI&quot;, only used for the meth, cyc, and mc parent sets

# Combined sets

ss_data_full_cond &lt;- ss_data %&gt;% 
  filter() %&gt;% # filter only data you want to include in FAs
  group_by(NULL) %&gt;% # grouping for calculating FAs
  calculate_FAs_cond(parent_set_name = &quot;full&quot;, subset_name = &quot;&quot;) # names of parent set and subset. this is called when importing the schematic pdf

ss_data_mc_5me_cond &lt;- ss_data %&gt;% 
  filter(methyl == &quot;I&quot; | pos == &quot;5&quot;) %&gt;%
  group_by(NULL) %&gt;% 
  calculate_FAs_cond(&quot;mc&quot;, &quot;5me&quot;)

ss_data_mc_6me_noI_cond &lt;- ss_data %&gt;% 
  filter(pos == &quot;6&quot;) %&gt;%
  group_by(NULL) %&gt;% 
  calculate_FAs_cond(&quot;mc&quot;, &quot;6me_noI&quot;)

ss_data_mc_cond &lt;- ss_data_mc_5me %&gt;% 
  bind_rows(ss_data_mc_6me_noI)

ss_data_ci_cond &lt;- ss_data %&gt;% 
  group_by(methyl) %&gt;% 
  calculate_FAs_cond(&quot;ci&quot;, &quot;&quot;)

ss_data_mi_cond &lt;- ss_data %&gt;% 
  group_by(cycle) %&gt;% 
  calculate_FAs_cond(&quot;mi&quot;, &quot;&quot;)


# Methylation sets

ss_data_meth_5me_cond &lt;- ss_data %&gt;% 
  filter(methyl == &quot;I&quot; | pos == &quot;5&quot;) %&gt;% 
  group_by(cycle) %&gt;% 
  calculate_FAs_cond(&quot;meth&quot;, &quot;5me&quot;) 

ss_data_meth_6me_cond &lt;- ss_data %&gt;%
  filter(methyl == &quot;I&quot; | pos == &quot;6&quot;) %&gt;%
  group_by(cycle) %&gt;%
  calculate_FAs_cond(&quot;meth&quot;, &quot;6me&quot;)

ss_data_meth_6me_noI_cond &lt;- ss_data %&gt;% # bind_rows with meth_5me to generate meth
  filter(pos == &quot;6&quot;) %&gt;%
  group_by(cycle) %&gt;%
  calculate_FAs_cond(&quot;meth&quot;, &quot;6me&quot;)

ss_data_meth_5me_noI_cond &lt;- ss_data %&gt;%
  filter(pos == &quot;5&quot;, methyl != &quot;I&quot;) %&gt;%
  group_by(cycle) %&gt;%
  calculate_FAs_cond(&quot;meth&quot;, &quot;5me&quot;)

ss_data_meth_cond &lt;- ss_data_meth_6me_noI %&gt;%
  filter(methyl == &quot;III&quot;) %&gt;% # only plot either II or III since they&#39;re redundant
  bind_rows(ss_data_meth_5me) %&gt;% 
  mutate(subset = &quot;both&quot;)


# Cyclization sets

ss_data_cyc_5me_cond &lt;- ss_data %&gt;%
  filter(methyl == &quot;I&quot; | pos == &quot;5&quot;) %&gt;%
  group_by(methyl) %&gt;%
  calculate_FAs_cond(&quot;cyc&quot;, &quot;5me&quot;)

ss_data_cyc_6me_cond &lt;- ss_data %&gt;%
  filter(methyl == &quot;I&quot; | pos == &quot;6&quot;) %&gt;%
  group_by(methyl) %&gt;%
  calculate_FAs_cond(&quot;cyc&quot;, &quot;6me&quot;)

ss_data_cyc_cond &lt;- ss_data_cyc_5me %&gt;% 
  bind_rows(ss_data_cyc_6me %&gt;% filter(methyl != &quot;I&quot;)) %&gt;% 
  mutate(subset = &quot;both&quot;)


# Isomer sets

ss_data_isom_cond &lt;- ss_data %&gt;%
  filter(methyl != &quot;I&quot;) %&gt;%
  group_by(methyl, cycle) %&gt;%
  calculate_FAs_cond(&quot;isom&quot;, &quot;&quot;) %&gt;%
  filter(pos == &quot;6&quot;) # just pick 5 or 6 since they&#39;re redundant  
 Generate pH subsets 
  # Used in selecting the schematic:
# Valid parent_set_names = &quot;meth&quot;, &quot;cyc&quot;, &quot;isom&quot;, &quot;mi&quot;, &quot;ci&quot;, &quot;mc&quot;, &quot;full&quot;. 
# Valid subset_names = &quot;both&quot;, &quot;5me&quot;, &quot;6me&quot;, &quot;5me_noI&quot;, &quot;6me_noI&quot;, only used for the meth, cyc, and mc parent sets

# Combined sets

ss_data_full_pH &lt;- ss_data %&gt;% 
  filter() %&gt;% # filter only data you want to include in FAs
  group_by(NULL) %&gt;% # grouping for calculating FAs
  calculate_FAs_pH(parent_set_name = &quot;full&quot;, subset_name = &quot;&quot;) # names of parent set and subset. this is called when importing the schematic pdf

ss_data_mc_5me_pH &lt;- ss_data %&gt;% 
  filter(methyl == &quot;I&quot; | pos == &quot;5&quot;) %&gt;%
  group_by(NULL) %&gt;% 
  calculate_FAs_pH(&quot;mc&quot;, &quot;5me&quot;)

ss_data_mc_6me_noI_pH &lt;- ss_data %&gt;% 
  filter(pos == &quot;6&quot;) %&gt;%
  group_by(NULL) %&gt;% 
  calculate_FAs_pH(&quot;mc&quot;, &quot;6me_noI&quot;)

ss_data_mc_pH &lt;- ss_data_mc_5me %&gt;% 
  bind_rows(ss_data_mc_6me_noI)

ss_data_ci_pH &lt;- ss_data %&gt;% 
  group_by(methyl) %&gt;% 
  calculate_FAs_pH(&quot;ci&quot;, &quot;&quot;)

ss_data_mi_pH &lt;- ss_data %&gt;% 
  group_by(cycle) %&gt;% 
  calculate_FAs_pH(&quot;mi&quot;, &quot;&quot;)


# Methylation sets

ss_data_meth_5me_pH &lt;- ss_data %&gt;% 
  filter(methyl == &quot;I&quot; | pos == &quot;5&quot;) %&gt;% 
  group_by(cycle) %&gt;% 
  calculate_FAs_pH(&quot;meth&quot;, &quot;5me&quot;) 

ss_data_meth_6me_pH &lt;- ss_data %&gt;%
  filter(methyl == &quot;I&quot; | pos == &quot;6&quot;) %&gt;%
  group_by(cycle) %&gt;%
  calculate_FAs_pH(&quot;meth&quot;, &quot;6me&quot;)

ss_data_meth_6me_noI_pH &lt;- ss_data %&gt;% # bind_rows with meth_5me to generate meth
  filter(pos == &quot;6&quot;) %&gt;%
  group_by(cycle) %&gt;%
  calculate_FAs_pH(&quot;meth&quot;, &quot;6me&quot;)

ss_data_meth_5me_noI_pH &lt;- ss_data %&gt;%
  filter(pos == &quot;5&quot;, methyl != &quot;I&quot;) %&gt;%
  group_by(cycle) %&gt;%
  calculate_FAs_pH(&quot;meth&quot;, &quot;5me&quot;)

ss_data_meth_pH &lt;- ss_data_meth_6me_noI %&gt;%
  filter(methyl == &quot;III&quot;) %&gt;% # only plot either II or III since they&#39;re redundant
  bind_rows(ss_data_meth_5me) %&gt;% 
  mutate(subset = &quot;both&quot;)


# Cyclization sets

ss_data_cyc_5me_pH &lt;- ss_data %&gt;%
  filter(methyl == &quot;I&quot; | pos == &quot;5&quot;) %&gt;%
  group_by(methyl) %&gt;%
  calculate_FAs_pH(&quot;cyc&quot;, &quot;5me&quot;)

ss_data_cyc_6me_pH &lt;- ss_data %&gt;%
  filter(methyl == &quot;I&quot; | pos == &quot;6&quot;) %&gt;%
  group_by(methyl) %&gt;%
  calculate_FAs_pH(&quot;cyc&quot;, &quot;6me&quot;)

ss_data_cyc_pH &lt;- ss_data_cyc_5me %&gt;% 
  bind_rows(ss_data_cyc_6me %&gt;% filter(methyl != &quot;I&quot;)) %&gt;% 
  mutate(subset = &quot;both&quot;)


# Isomer sets

ss_data_isom_pH &lt;- ss_data %&gt;%
  filter(methyl != &quot;I&quot;) %&gt;%
  group_by(methyl, cycle) %&gt;%
  calculate_FAs_pH(&quot;isom&quot;, &quot;&quot;) %&gt;%
  filter(pos == &quot;6&quot;) # just pick 5 or 6 since they&#39;re redundant  
 Generate DO subsets 
  # Used in selecting the schematic:
# Valid parent_set_names = &quot;meth&quot;, &quot;cyc&quot;, &quot;isom&quot;, &quot;mi&quot;, &quot;ci&quot;, &quot;mc&quot;, &quot;full&quot;. 
# Valid subset_names = &quot;both&quot;, &quot;5me&quot;, &quot;6me&quot;, &quot;5me_noI&quot;, &quot;6me_noI&quot;, only used for the meth, cyc, and mc parent sets

# Combined sets

ss_data_full_DO &lt;- ss_data %&gt;% 
  filter() %&gt;% # filter only data you want to include in FAs
  group_by(NULL) %&gt;% # grouping for calculating FAs
  calculate_FAs_DO(parent_set_name = &quot;full&quot;, subset_name = &quot;&quot;) # names of parent set and subset. this is called when importing the schematic pdf

ss_data_mc_5me_DO &lt;- ss_data %&gt;% 
  filter(methyl == &quot;I&quot; | pos == &quot;5&quot;) %&gt;%
  group_by(NULL) %&gt;% 
  calculate_FAs_DO(&quot;mc&quot;, &quot;5me&quot;)

ss_data_mc_6me_noI_DO &lt;- ss_data %&gt;% 
  filter(pos == &quot;6&quot;) %&gt;%
  group_by(NULL) %&gt;% 
  calculate_FAs_DO(&quot;mc&quot;, &quot;6me_noI&quot;)

ss_data_mc_DO &lt;- ss_data_mc_5me %&gt;% 
  bind_rows(ss_data_mc_6me_noI)

ss_data_ci_DO &lt;- ss_data %&gt;% 
  group_by(methyl) %&gt;% 
  calculate_FAs_DO(&quot;ci&quot;, &quot;&quot;)

ss_data_mi_DO &lt;- ss_data %&gt;% 
  group_by(cycle) %&gt;% 
  calculate_FAs_DO(&quot;mi&quot;, &quot;&quot;)


# Methylation sets

ss_data_meth_5me_DO &lt;- ss_data %&gt;% 
  filter(methyl == &quot;I&quot; | pos == &quot;5&quot;) %&gt;% 
  group_by(cycle) %&gt;% 
  calculate_FAs_DO(&quot;meth&quot;, &quot;5me&quot;) 

ss_data_meth_6me_DO &lt;- ss_data %&gt;%
  filter(methyl == &quot;I&quot; | pos == &quot;6&quot;) %&gt;%
  group_by(cycle) %&gt;%
  calculate_FAs_DO(&quot;meth&quot;, &quot;6me&quot;)

ss_data_meth_6me_noI_DO &lt;- ss_data %&gt;% # bind_rows with meth_5me to generate meth
  filter(pos == &quot;6&quot;) %&gt;%
  group_by(cycle) %&gt;%
  calculate_FAs_DO(&quot;meth&quot;, &quot;6me&quot;)

ss_data_meth_5me_noI_DO &lt;- ss_data %&gt;%
  filter(pos == &quot;5&quot;, methyl != &quot;I&quot;) %&gt;%
  group_by(cycle) %&gt;%
  calculate_FAs_DO(&quot;meth&quot;, &quot;5me&quot;)

ss_data_meth_DO &lt;- ss_data_meth_6me_noI %&gt;%
  filter(methyl == &quot;III&quot;) %&gt;% # only plot either II or III since they&#39;re redundant
  bind_rows(ss_data_meth_5me) %&gt;% 
  mutate(subset = &quot;both&quot;)


# Cyclization sets

ss_data_cyc_5me_DO &lt;- ss_data %&gt;%
  filter(methyl == &quot;I&quot; | pos == &quot;5&quot;) %&gt;%
  group_by(methyl) %&gt;%
  calculate_FAs_DO(&quot;cyc&quot;, &quot;5me&quot;)

ss_data_cyc_6me_DO &lt;- ss_data %&gt;%
  filter(methyl == &quot;I&quot; | pos == &quot;6&quot;) %&gt;%
  group_by(methyl) %&gt;%
  calculate_FAs_DO(&quot;cyc&quot;, &quot;6me&quot;)

ss_data_cyc_DO &lt;- ss_data_cyc_5me %&gt;% 
  bind_rows(ss_data_cyc_6me %&gt;% filter(methyl != &quot;I&quot;)) %&gt;% 
  mutate(subset = &quot;both&quot;)


# Isomer sets

ss_data_isom_DO &lt;- ss_data %&gt;%
  filter(methyl != &quot;I&quot;) %&gt;%
  group_by(methyl, cycle) %&gt;%
  calculate_FAs_DO(&quot;isom&quot;, &quot;&quot;) %&gt;%
  filter(pos == &quot;6&quot;) # just pick 5 or 6 since they&#39;re redundant  
 
 
 Meth and MC Subset Variations 
 
 Figure S4. Meth-5Me+ 
 Tetramethylated compounds included 
  subset_df &lt;- ss_data_meth_5me %&gt;%
  mutate(env_var = temp) %&gt;%
  arrange(desc(pos), methyl, cycle) %&gt;%
  mutate(panel = as_factor(label)) #panel is compound by default

# generate formatted levels
levels(subset_df$panel) &lt;- as.character(latex2exp::TeX(levels(subset_df$panel)))

# plot
p &lt;- base_plot %+% filter(subset_df, TRUE) + 
    facet_wrap(~panel, scales = &quot;free_y&quot;, ncol = 3, labeller = label_parsed) +
    theme(strip.background = element_rect(fill = &quot;gray&quot;), strip.text = element_text(size = 10, hjust = 0.1)) +
    xlab(&quot;MAF (°C)&quot;)
plot_grid(
  create_image_row_2(subset_df, y_axis_label_width = 0.034, y_axes_width = 0.062), #0.17 # 0.045
  p,
  ncol = 1L,
  rel_heights = c(0.17, 1)
)  
   
 
 
 Figure S5. Meth-6Me+ 
 Tetramethylated compounds included 
  subset_df &lt;- ss_data_meth_6me %&gt;%
  mutate(pos = 6) %&gt;% # calling the tetramethylated compounds &quot;6-methyls&quot;
  mutate(env_var = temp) %&gt;%
  arrange(desc(pos), methyl, cycle) %&gt;%
  mutate(panel = as_factor(label)) #panel is compound by default

# generate formatted levels
levels(subset_df$panel) &lt;- as.character(latex2exp::TeX(levels(subset_df$panel)))

# plot
p &lt;- base_plot %+% filter(subset_df, TRUE) + 
    facet_wrap(~panel, scales = &quot;free_y&quot;, ncol = 3, labeller = label_parsed) +
    theme(strip.background = element_rect(fill = &quot;gray&quot;), strip.text = element_text(size = 10, hjust = 0.1)) +
    xlab(&quot;MAF (°C)&quot;)
plot_grid(
  create_image_row_2(subset_df, y_axis_label_width = 0.034, y_axes_width = 0.062), #0.17 # 0.045
  p,
  ncol = 1L,
  rel_heights = c(0.17, 1)
)  
   
 
 
 Figure S6. Meth-5Me 
 Tetramethylated compounds not included 
  subset_df &lt;- ss_data_meth_5me_noI %&gt;%
  mutate(subset = &quot;5me_noI&quot;) %&gt;% 
  mutate(env_var = temp) %&gt;%
  arrange(desc(pos), methyl, cycle) %&gt;%
  mutate(panel = as_factor(label)) #panel is compound by default

# generate formatted levels
levels(subset_df$panel) &lt;- as.character(latex2exp::TeX(levels(subset_df$panel)))

# plot
p &lt;- base_plot %+% filter(subset_df, TRUE) + 
    facet_wrap(~panel, scales = &quot;free_y&quot;, ncol = 3, labeller = label_parsed) +
    theme(strip.background = element_rect(fill = &quot;gray&quot;), strip.text = element_text(size = 10, hjust = 0.1)) +
    xlab(&quot;MAF (°C)&quot;)
plot_grid(
  create_image_row_2(subset_df, y_axis_label_width = 0.034, y_axes_width = 0.062), #0.17 # 0.045
  p,
  ncol = 1L,
  rel_heights = c(0.17, 1)
)  
   
 
 
 Figure S7. Meth-6Me 
 Tetramethylated compounds not included 
  subset_df &lt;- ss_data_meth_6me_noI %&gt;%
  mutate(subset = &quot;6me_noI&quot;) %&gt;% 
  mutate(env_var = temp) %&gt;%
  arrange(desc(pos), methyl, cycle) %&gt;%
  mutate(panel = as_factor(label)) #panel is compound by default

# generate formatted levels
levels(subset_df$panel) &lt;- as.character(latex2exp::TeX(levels(subset_df$panel)))

# plot
p &lt;- base_plot %+% filter(subset_df, TRUE) + 
    facet_wrap(~panel, scales = &quot;free_y&quot;, ncol = 3, labeller = label_parsed) +
    theme(strip.background = element_rect(fill = &quot;gray&quot;), strip.text = element_text(size = 10, hjust = 0.1)) +
    xlab(&quot;MAF (°C)&quot;)
plot_grid(
  create_image_row_2(subset_df, y_axis_label_width = 0.034, y_axes_width = 0.062), #0.17 # 0.045
  p,
  ncol = 1L,
  rel_heights = c(0.17, 1)
)  
   
 
 
 Figure S8. MC-5Me+ 
 Tetramethylated compounds included 
  # 12x8 output without schematics
subset_df &lt;- ss_data_mc_5me %&gt;%
  mutate(env_var = temp) %&gt;%
  arrange(pos, methyl, cycle) %&gt;%
  mutate(panel = as_factor(label)) #panel is compound by default

# generate formatted levels
levels(subset_df$panel) &lt;- as.character(latex2exp::TeX(levels(subset_df$panel)))

p &lt;- base_plot %+% filter(subset_df, TRUE) + 
    #facet_grid(methyl + pos ~ cycle, scales = &quot;free_y&quot;) + 
    facet_wrap(~panel, scales = &quot;free_y&quot;, ncol = 3, labeller = label_parsed) +
    theme(strip.background = element_rect(fill = &quot;gray&quot;), strip.text = element_text(size = 10, hjust = 0.5)) +
    xlab(&quot;MAF (°C)&quot;)
plot_grid(
  p,
  create_image_col(subset_df, y_height = 0.2, rel_heights = c(1)),
  nrow = 1L,
  rel_widths = c(1, 0.16)
)  
   
 
 
 Figure S9. MC-6Me+ 
 Tetramethylated compounds included 
  # 12x8 output without schematics
subset_df &lt;- ss_data_mc_6me %&gt;%
  mutate(pos = &quot;6&quot;) %&gt;% 
  mutate(env_var = temp) %&gt;%
  arrange(pos, methyl, cycle) %&gt;%
  mutate(panel = as_factor(label)) #panel is compound by default

# generate formatted levels
levels(subset_df$panel) &lt;- as.character(latex2exp::TeX(levels(subset_df$panel)))

p &lt;- base_plot %+% filter(subset_df, TRUE) + 
    #facet_grid(methyl + pos ~ cycle, scales = &quot;free_y&quot;) + 
    facet_wrap(~panel, scales = &quot;free_y&quot;, ncol = 3, labeller = label_parsed) +
    theme(strip.background = element_rect(fill = &quot;gray&quot;), strip.text = element_text(size = 10, hjust = 0.5)) +
    xlab(&quot;MAF (°C)&quot;)
plot_grid(
  p,
  create_image_col(subset_df, y_height = 0.2, rel_heights = c(1)),
  nrow = 1L,
  rel_widths = c(1, 0.16)
)  
   
 
 
 Figure S10. MC-5Me 
 Tetramethylated compounds not included 
  # 12x8 output without schematics
subset_df &lt;- ss_data_mc_5me_noI %&gt;%
  mutate(env_var = temp) %&gt;%
  arrange(pos, methyl, cycle) %&gt;%
  mutate(panel = as_factor(label)) #panel is compound by default

# generate formatted levels
levels(subset_df$panel) &lt;- as.character(latex2exp::TeX(levels(subset_df$panel)))

p &lt;- base_plot %+% filter(subset_df, TRUE) + 
    #facet_grid(methyl + pos ~ cycle, scales = &quot;free_y&quot;) + 
    facet_wrap(~panel, scales = &quot;free_y&quot;, ncol = 3, labeller = label_parsed) +
    theme(strip.background = element_rect(fill = &quot;gray&quot;), strip.text = element_text(size = 10, hjust = 0.5)) +
    xlab(&quot;MAF (°C)&quot;)
plot_grid(
  p,
  create_image_col(subset_df, y_height = 0.2, rel_heights = c(1)),
  nrow = 1L,
  rel_widths = c(1, 0.16)
)  
   
 
 
 Figure S11. MC-6Me 
 Tetramethylated compounds not included 
  # 12x8 output without schematics
subset_df &lt;- ss_data_mc_6me_noI %&gt;%
  mutate(env_var = temp) %&gt;%
  arrange(pos, methyl, cycle) %&gt;%
  mutate(panel = as_factor(label)) #panel is compound by default

# generate formatted levels
levels(subset_df$panel) &lt;- as.character(latex2exp::TeX(levels(subset_df$panel)))

p &lt;- base_plot %+% filter(subset_df, TRUE) + 
    #facet_grid(methyl + pos ~ cycle, scales = &quot;free_y&quot;) + 
    facet_wrap(~panel, scales = &quot;free_y&quot;, ncol = 3, labeller = label_parsed) +
    theme(strip.background = element_rect(fill = &quot;gray&quot;), strip.text = element_text(size = 10, hjust = 0.5)) +
    xlab(&quot;MAF (°C)&quot;)
plot_grid(
  p,
  create_image_col(subset_df, y_height = 0.2, rel_heights = c(1)),
  nrow = 1L,
  rel_widths = c(1, 0.16)
)  
   
 
 
 
 Temperature (Months Above Freezing) 
 
 Figure S12. Meth 
  subset_df &lt;- ss_data_meth_6me_noI %&gt;% 
  filter(methyl == &quot;III&quot;) %&gt;% # II and III are just inverses, only plot one of them
  bind_rows(ss_data_meth_5me) %&gt;% 
  mutate(subset = &quot;both&quot;) %&gt;% # to select the correct image
  mutate(env_var = temp) %&gt;%
  arrange(methyl, pos, cycle) %&gt;%
  mutate(panel = as_factor(label)) #panel is compound by default

# generate formatted levels
levels(subset_df$panel) &lt;- as.character(latex2exp::TeX(levels(subset_df$panel)))

# plot
p &lt;- base_plot %+% filter(subset_df, TRUE) + 
    facet_wrap(~panel, scales = &quot;free_y&quot;, ncol = 3, labeller = label_parsed) +
    theme(strip.background = element_rect(fill = &quot;gray&quot;), strip.text = element_text(size = 10, hjust = 0.1)) +
    xlab(&quot;MAF (°C)&quot;)
plot_grid(
  create_image_row_2(subset_df, y_axis_label_width = 0.034, y_axes_width = 0.062), #0.17 # 0.045
  p,
  ncol = 1L,
  rel_heights = c(0.17, 1)
)  
   
 
 
 Figure S13. Cyc 
  subset_df &lt;- ss_data_cyc_6me %&gt;% 
  filter(methyl != &quot;I&quot;) %&gt;% # avoid double-plotting
  bind_rows(ss_data_cyc_5me) %&gt;% 
  mutate(subset = &quot;both&quot;) %&gt;% # to select the correct image 
  mutate(env_var = temp) %&gt;%
  arrange(methyl, pos, cycle) %&gt;%
  mutate(panel = as_factor(label)) #panel is compound by default

# generate formatted levels
levels(subset_df$panel) &lt;- as.character(latex2exp::TeX(levels(subset_df$panel)))

p &lt;- base_plot %+% filter(subset_df, TRUE) + 
    #facet_grid(methyl + pos ~ cycle, scales = &quot;free_y&quot;) + 
    facet_wrap(~panel, scales = &quot;free_y&quot;, ncol = 3, labeller = label_parsed) +
    theme(strip.background = element_rect(fill = &quot;gray&quot;), strip.text = element_text(size = 10, hjust = 0.5)) +
    xlab(&quot;MAF (°C)&quot;)
plot_grid(
  p,
  create_image_col(subset_df, y_height = 0.2, rel_heights = c(1,2,2)),
  nrow = 1L,
  rel_widths = c(1, 0.16)
)  
   
 
 
 Figure S14. Isom 
  subset_df &lt;- ss_data_isom %&gt;% 
  mutate(env_var = temp) %&gt;%
  arrange(methyl, pos, cycle) %&gt;%
  mutate(panel = as_factor(label)) #panel is compound by default

# generate formatted levels
levels(subset_df$panel) &lt;- as.character(latex2exp::TeX(levels(subset_df$panel)))

# plot
p &lt;- base_plot %+% filter(subset_df, TRUE) + 
    facet_wrap(~panel, scales = &quot;free_y&quot;, ncol = 3, labeller = label_parsed) +
    theme(strip.background = element_rect(fill = &quot;gray&quot;), strip.text = element_text(size = 10, hjust = 0.1)) +
    xlab(&quot;MAF (°C)&quot;)
plot_grid(
  create_image_row_2(subset_df, y_axis_label_width = 0.034, y_axes_width = 0.062), #0.17
  p,
  ncol = 1L,
  rel_heights = c(0.18, 1)
)  
   
 
 
 Figure S15. Meth-Isom 
  subset_df &lt;- ss_data_mi %&gt;% 
  mutate(env_var = temp) %&gt;%
  arrange(methyl, pos, cycle) %&gt;%
  mutate(panel = as_factor(label)) #panel is compound by default

# generate formatted levels
levels(subset_df$panel) &lt;- as.character(latex2exp::TeX(levels(subset_df$panel)))

# plot
p &lt;- base_plot %+% filter(subset_df, TRUE) + 
    facet_wrap(~panel, scales = &quot;free_y&quot;, ncol = 3, labeller = label_parsed) +
    theme(strip.background = element_rect(fill = &quot;gray&quot;), strip.text = element_text(size = 10, hjust = 0.1)) +
    xlab(&quot;MAF (°C)&quot;)
plot_grid(
  create_image_row_2(subset_df, y_axis_label_width = 0.03, y_axes_width = 0.05), #0.17
  p,
  ncol = 1L,
  rel_heights = c(0.15, 1)
)  
   
 
 
 Figure S16. Cyc-Isom 
  # 12x8 output without schematics
subset_df &lt;- ss_data_ci %&gt;%
  mutate(env_var = temp) %&gt;%
  arrange(methyl, pos, cycle) %&gt;%
  mutate(panel = as_factor(label)) #panel is compound by default

# generate formatted levels
levels(subset_df$panel) &lt;- as.character(latex2exp::TeX(levels(subset_df$panel)))

p &lt;- base_plot %+% filter(subset_df, TRUE) + 
    #facet_grid(methyl + pos ~ cycle, scales = &quot;free_y&quot;) + 
    facet_wrap(~panel, scales = &quot;free_y&quot;, ncol = 3, labeller = label_parsed) +
    theme(strip.background = element_rect(fill = &quot;gray&quot;), strip.text = element_text(size = 10, hjust = 0.5)) +
    xlab(&quot;MAF (°C)&quot;)
plot_grid(
  p,
  create_image_col(subset_df, y_height = 0.2, rel_heights = c(1,2,2)),
  nrow = 1L,
  rel_widths = c(1, 0.16)
)  
   
 
 
 Figure S17. Meth-Cyc 
  # 12x8 output without schematics
subset_df &lt;- ss_data_mc_6me_noI %&gt;%
  bind_rows(ss_data_mc_5me) %&gt;% 
  mutate(env_var = temp) %&gt;%
  arrange(pos, methyl, cycle) %&gt;%
  mutate(panel = as_factor(label)) #panel is compound by default

# generate formatted levels
levels(subset_df$panel) &lt;- as.character(latex2exp::TeX(levels(subset_df$panel)))

p &lt;- base_plot %+% filter(subset_df, TRUE) + 
    #facet_grid(methyl + pos ~ cycle, scales = &quot;free_y&quot;) + 
    facet_wrap(~panel, scales = &quot;free_y&quot;, ncol = 3, labeller = label_parsed) +
    theme(strip.background = element_rect(fill = &quot;gray&quot;), strip.text = element_text(size = 10, hjust = 0.5)) +
    xlab(&quot;MAF (°C)&quot;)
plot_grid(
  p,
  create_image_col(subset_df, y_height = 0.2, rel_heights = c(3,2,0.9)),
  nrow = 1L,
  rel_widths = c(1, 0.16)
)  
   
 
 
 Figure S18. Full 
  subset_df &lt;- ss_data_full %&gt;% 
  mutate(env_var = temp) %&gt;%
  arrange(methyl, pos, cycle) %&gt;%
  mutate(panel = as_factor(label)) #panel is compound by default

# generate formatted levels
levels(subset_df$panel) &lt;- as.character(latex2exp::TeX(levels(subset_df$panel)))

# plot
p &lt;- base_plot %+% filter(subset_df, TRUE) + 
    facet_wrap(~panel, scales = &quot;free_y&quot;, ncol = 3, labeller = label_parsed) +
    theme(strip.background = element_rect(fill = &quot;gray&quot;), strip.text = element_text(size = 10, hjust = 0.1)) +
    xlab(&quot;MAF (°C)&quot;)
plot_grid(
  create_image_row_2(subset_df, y_axis_label_width = 0.045, y_axes_width = 0), #0.17
  p,
  ncol = 1L,
  rel_heights = c(0.12, 1)
)  
   
 
 
 
 Conductivity 
 
 Figure S19. Meth 
  subset_df &lt;- ss_data_meth_6me_noI_cond %&gt;% 
  filter(methyl == &quot;III&quot;) %&gt;% # II and III are just inverses, only plot one of them
  bind_rows(ss_data_meth_5me_cond) %&gt;% 
  mutate(subset = &quot;both&quot;) %&gt;% # to select the correct image 
  mutate(env_var = ln_conductivity) %&gt;%
  arrange(methyl, pos, cycle) %&gt;%
  mutate(panel = as_factor(label)) #panel is compound by default

# generate formatted levels
levels(subset_df$panel) &lt;- as.character(latex2exp::TeX(levels(subset_df$panel)))

# plot
p &lt;- base_plot %+% filter(subset_df, TRUE) + 
    facet_wrap(~panel, scales = &quot;free_y&quot;, ncol = 3, labeller = label_parsed) +
    theme(strip.background = element_rect(fill = &quot;gray&quot;), strip.text = element_text(size = 10, hjust = 0.1)) +
    xlab(&quot;ln(Conductivity)&quot;)
plot_grid(
  create_image_row_2(subset_df, y_axis_label_width = 0.034, y_axes_width = 0.062), #0.17
  p,
  ncol = 1L,
  rel_heights = c(0.17, 1)
)  
   
 
 
 Figure S20. Cyc 
  subset_df &lt;- ss_data_cyc_6me_cond %&gt;% 
  filter(methyl != &quot;I&quot;) %&gt;% # avoid double-plotting
  bind_rows(ss_data_cyc_5me_cond) %&gt;% 
  mutate(subset = &quot;both&quot;) %&gt;% # to select the correct image 
  mutate(env_var = ln_conductivity) %&gt;%
  arrange(methyl, pos, cycle) %&gt;%
  mutate(panel = as_factor(label)) #panel is compound by default

# generate formatted levels
levels(subset_df$panel) &lt;- as.character(latex2exp::TeX(levels(subset_df$panel)))

p &lt;- base_plot %+% filter(subset_df, TRUE) + 
    #facet_grid(methyl + pos ~ cycle, scales = &quot;free_y&quot;) + 
    facet_wrap(~panel, scales = &quot;free_y&quot;, ncol = 3, labeller = label_parsed) +
    theme(strip.background = element_rect(fill = &quot;gray&quot;), strip.text = element_text(size = 10, hjust = 0.5)) +
    xlab(&quot;ln(Conductivity)&quot;)
plot_grid(
  p,
  create_image_col(subset_df, y_height = 0.2, rel_heights = c(1,2,2)),
  nrow = 1L,
  rel_widths = c(1, 0.16)
)  
   
 
 
 Figure S21. Isom 
  subset_df &lt;- ss_data_isom_cond %&gt;% 
  mutate(env_var = ln_conductivity) %&gt;%
  arrange(methyl, pos, cycle) %&gt;%
  mutate(panel = as_factor(label)) #panel is compound by default

# generate formatted levels
levels(subset_df$panel) &lt;- as.character(latex2exp::TeX(levels(subset_df$panel)))

# plot
p &lt;- base_plot %+% filter(subset_df, TRUE) + 
    facet_wrap(~panel, scales = &quot;free_y&quot;, ncol = 3, labeller = label_parsed) +
    theme(strip.background = element_rect(fill = &quot;gray&quot;), strip.text = element_text(size = 10, hjust = 0.1)) +
    xlab(&quot;ln(Conductivity)&quot;)
plot_grid(
  create_image_row_2(subset_df, y_axis_label_width = 0.034, y_axes_width = 0.062), #0.17
  p,
  ncol = 1L,
  rel_heights = c(0.18, 1)
)  
   
 
 
 Figure S22. Meth-Isom 
  subset_df &lt;- ss_data_mi_cond %&gt;% 
  mutate(env_var = ln_conductivity) %&gt;%
  arrange(methyl, pos, cycle) %&gt;%
  mutate(panel = as_factor(label)) #panel is compound by default

# generate formatted levels
levels(subset_df$panel) &lt;- as.character(latex2exp::TeX(levels(subset_df$panel)))

# plot
p &lt;- base_plot %+% filter(subset_df, TRUE) + 
    facet_wrap(~panel, scales = &quot;free_y&quot;, ncol = 3, labeller = label_parsed) +
    theme(strip.background = element_rect(fill = &quot;gray&quot;), strip.text = element_text(size = 10, hjust = 0.1)) +
    xlab(&quot;ln(Conductivity)&quot;)
plot_grid(
  create_image_row_2(subset_df, y_axis_label_width = 0.03, y_axes_width = 0.05), #0.17
  p,
  ncol = 1L,
  rel_heights = c(0.15, 1)
)  
   
 
 
 Figure S23. Cyc-Isom 
  # 12x8 output without schematics
subset_df &lt;- ss_data_ci_cond %&gt;%
  mutate(env_var = ln_conductivity) %&gt;%
  arrange(methyl, pos, cycle) %&gt;%
  mutate(panel = as_factor(label)) #panel is compound by default

# generate formatted levels
levels(subset_df$panel) &lt;- as.character(latex2exp::TeX(levels(subset_df$panel)))

p &lt;- base_plot %+% filter(subset_df, TRUE) + 
    #facet_grid(methyl + pos ~ cycle, scales = &quot;free_y&quot;) + 
    facet_wrap(~panel, scales = &quot;free_y&quot;, ncol = 3, labeller = label_parsed) +
    theme(strip.background = element_rect(fill = &quot;gray&quot;), strip.text = element_text(size = 10, hjust = 0.5)) +
    xlab(&quot;ln(Conductivity)&quot;)
plot_grid(
  p,
  create_image_col(subset_df, y_height = 0.2, rel_heights = c(1,2,2)),
  nrow = 1L,
  rel_widths = c(1, 0.16)
)  
   
 
 
 Figure S24. Meth-Cyc 
  subset_df &lt;- ss_data_mc_6me_noI_cond %&gt;%
  bind_rows(ss_data_mc_5me_cond) %&gt;% 
  mutate(env_var = ln_conductivity) %&gt;%
  arrange(pos, methyl, cycle) %&gt;%
  mutate(panel = as_factor(label)) #panel is compound by default

# generate formatted levels
levels(subset_df$panel) &lt;- as.character(latex2exp::TeX(levels(subset_df$panel)))

p &lt;- base_plot %+% filter(subset_df, TRUE) + 
    #facet_grid(methyl + pos ~ cycle, scales = &quot;free_y&quot;) + 
    facet_wrap(~panel, scales = &quot;free_y&quot;, ncol = 3, labeller = label_parsed) +
    theme(strip.background = element_rect(fill = &quot;gray&quot;), strip.text = element_text(size = 10, hjust = 0.5)) +
    xlab(&quot;ln(Conductivity)&quot;)
plot_grid(
  p,
  create_image_col(subset_df, y_height = 0.2, rel_heights = c(3,2,0.9)),
  nrow = 1L,
  rel_widths = c(1, 0.16)
)  
   
 
 
 Figure S25. Full 
  subset_df &lt;- ss_data_full_cond %&gt;% 
  mutate(env_var = ln_conductivity) %&gt;%
  arrange(methyl, pos, cycle) %&gt;%
  mutate(panel = as_factor(label)) #panel is compound by default

# generate formatted levels
levels(subset_df$panel) &lt;- as.character(latex2exp::TeX(levels(subset_df$panel)))

# plot
p &lt;- base_plot %+% filter(subset_df, TRUE) + 
    facet_wrap(~panel, scales = &quot;free_y&quot;, ncol = 3, labeller = label_parsed) +
    theme(strip.background = element_rect(fill = &quot;gray&quot;), strip.text = element_text(size = 10, hjust = 0.1)) +
    xlab(&quot;ln(Conductivity)&quot;)
plot_grid(
  create_image_row_2(subset_df, y_axis_label_width = 0.045, y_axes_width = 0), #0.17
  p,
  ncol = 1L,
  rel_heights = c(0.12, 1)
)  
   
 
 
 
 pH 
 
 Figure S26. Meth 
  subset_df &lt;- ss_data_meth_6me_noI_pH %&gt;% 
  filter(methyl == &quot;III&quot;) %&gt;% # II and III are just inverses, only plot one of them
  bind_rows(ss_data_meth_5me_pH) %&gt;% 
  mutate(subset = &quot;both&quot;) %&gt;% # to select the correct image 
  mutate(env_var = pH) %&gt;%
  arrange(methyl, pos, cycle) %&gt;%
  mutate(panel = as_factor(label)) #panel is compound by default

# generate formatted levels
levels(subset_df$panel) &lt;- as.character(latex2exp::TeX(levels(subset_df$panel)))

# plot
p &lt;- base_plot %+% filter(subset_df, TRUE) + 
    facet_wrap(~panel, scales = &quot;free_y&quot;, ncol = 3, labeller = label_parsed) +
    theme(strip.background = element_rect(fill = &quot;gray&quot;), strip.text = element_text(size = 10, hjust = 0.1)) +
    xlab(&quot;pH&quot;)
plot_grid(
  create_image_row_2(subset_df, y_axis_label_width = 0.034, y_axes_width = 0.062), #0.17
  p,
  ncol = 1L,
  rel_heights = c(0.17, 1)
)  
   
 
 
 Figure S27. Cyc 
  subset_df &lt;- ss_data_cyc_6me_pH %&gt;% 
  filter(methyl != &quot;I&quot;) %&gt;% # avoid double-plotting
  bind_rows(ss_data_cyc_5me_pH) %&gt;% 
  mutate(subset = &quot;both&quot;) %&gt;% # to select the correct image 
  mutate(env_var = pH) %&gt;%
  arrange(methyl, pos, cycle) %&gt;%
  mutate(panel = as_factor(label)) #panel is compound by default

# generate formatted levels
levels(subset_df$panel) &lt;- as.character(latex2exp::TeX(levels(subset_df$panel)))

p &lt;- base_plot %+% filter(subset_df, TRUE) + 
    facet_wrap(~panel, scales = &quot;free_y&quot;, ncol = 3, labeller = label_parsed) +
    theme(strip.background = element_rect(fill = &quot;gray&quot;), strip.text = element_text(size = 10, hjust = 0.5)) +
    xlab(&quot;pH&quot;)
plot_grid(
  p,
  create_image_col(subset_df, y_height = 0.2, rel_heights = c(1,2,2)),
  nrow = 1L,
  rel_widths = c(1, 0.16)
)  
   
 
 
 Figure S28. Isom 
  subset_df &lt;- ss_data_isom_pH %&gt;% 
  mutate(env_var = pH) %&gt;%
  arrange(methyl, pos, cycle) %&gt;%
  mutate(panel = as_factor(label)) #panel is compound by default

# generate formatted levels
levels(subset_df$panel) &lt;- as.character(latex2exp::TeX(levels(subset_df$panel)))

# plot
p &lt;- base_plot %+% filter(subset_df, TRUE) + 
    facet_wrap(~panel, scales = &quot;free_y&quot;, ncol = 3, labeller = label_parsed) +
    theme(strip.background = element_rect(fill = &quot;gray&quot;), strip.text = element_text(size = 10, hjust = 0.1)) +
    xlab(&quot;pH&quot;)
plot_grid(
  create_image_row_2(subset_df, y_axis_label_width = 0.034, y_axes_width = 0.062), #0.17
  p,
  ncol = 1L,
  rel_heights = c(0.18, 1)
)  
   
 
 
 Figure S29. Meth-Isom 
  subset_df &lt;- ss_data_mi_pH %&gt;% 
  mutate(env_var = pH) %&gt;%
  arrange(methyl, pos, cycle) %&gt;%
  mutate(panel = as_factor(label)) #panel is compound by default

# generate formatted levels
levels(subset_df$panel) &lt;- as.character(latex2exp::TeX(levels(subset_df$panel)))

# plot
p &lt;- base_plot %+% filter(subset_df, TRUE) + 
    facet_wrap(~panel, scales = &quot;free_y&quot;, ncol = 3, labeller = label_parsed) +
    theme(strip.background = element_rect(fill = &quot;gray&quot;), strip.text = element_text(size = 10, hjust = 0.1)) +
    xlab(&quot;pH&quot;)
plot_grid(
  create_image_row_2(subset_df, y_axis_label_width = 0.03, y_axes_width = 0.05), #0.17
  p,
  ncol = 1L,
  rel_heights = c(0.15, 1)
)  
   
 
 
 Figure S30. Cyc-Isom 
  # 12x8 output without schematics
subset_df &lt;- ss_data_ci_pH %&gt;%
  mutate(env_var = pH) %&gt;%
  arrange(methyl, pos, cycle) %&gt;%
  mutate(panel = as_factor(label)) #panel is compound by default

# generate formatted levels
levels(subset_df$panel) &lt;- as.character(latex2exp::TeX(levels(subset_df$panel)))

p &lt;- base_plot %+% filter(subset_df, TRUE) + 
    facet_wrap(~panel, scales = &quot;free_y&quot;, ncol = 3, labeller = label_parsed) +
    theme(strip.background = element_rect(fill = &quot;gray&quot;), strip.text = element_text(size = 10, hjust = 0.5)) +
    xlab(&quot;pH&quot;)
plot_grid(
  p,
  create_image_col(subset_df, y_height = 0.2, rel_heights = c(1,2,2)),
  nrow = 1L,
  rel_widths = c(1, 0.16)
)  
   
 
 
 Figure S31. Meth-Cyc 
  subset_df &lt;- ss_data_mc_6me_noI_pH %&gt;%
  bind_rows(ss_data_mc_5me_pH) %&gt;% 
  mutate(env_var = pH) %&gt;%
  arrange(pos, methyl, cycle) %&gt;%
  mutate(panel = as_factor(label)) #panel is compound by default

# generate formatted levels
levels(subset_df$panel) &lt;- as.character(latex2exp::TeX(levels(subset_df$panel)))

p &lt;- base_plot %+% filter(subset_df, TRUE) + 
    facet_wrap(~panel, scales = &quot;free_y&quot;, ncol = 3, labeller = label_parsed) +
    theme(strip.background = element_rect(fill = &quot;gray&quot;), strip.text = element_text(size = 10, hjust = 0.5)) +
    xlab(&quot;pH&quot;)
plot_grid(
  p,
  create_image_col(subset_df, y_height = 0.2, rel_heights = c(3,2,0.9)),
  nrow = 1L,
  rel_widths = c(1, 0.16)
)  
   
 
 
 Figure S32. Full 
  subset_df &lt;- ss_data_full_pH %&gt;% 
  mutate(env_var = pH) %&gt;%
  arrange(methyl, pos, cycle) %&gt;%
  mutate(panel = as_factor(label)) #panel is compound by default

# generate formatted levels
levels(subset_df$panel) &lt;- as.character(latex2exp::TeX(levels(subset_df$panel)))

# plot
p &lt;- base_plot %+% filter(subset_df, TRUE) + 
    facet_wrap(~panel, scales = &quot;free_y&quot;, ncol = 3, labeller = label_parsed) +
    theme(strip.background = element_rect(fill = &quot;gray&quot;), strip.text = element_text(size = 10, hjust = 0.1)) +
    xlab(&quot;pH&quot;)
plot_grid(
  create_image_row_2(subset_df, y_axis_label_width = 0.045, y_axes_width = 0), #0.17
  p,
  ncol = 1L,
  rel_heights = c(0.12, 1)
)  
   
 
 
 
 Dissolved Oxygen (mean) 
 
 Figure S33. Meth 
  subset_df &lt;- ss_data_meth_6me_noI_DO %&gt;% 
  filter(methyl == &quot;III&quot;) %&gt;% # II and III are just inverses, only plot one of them
  bind_rows(ss_data_meth_5me_DO) %&gt;% 
  mutate(subset = &quot;both&quot;) %&gt;% # to select the correct image 
  mutate(env_var = DO) %&gt;%
  arrange(methyl, pos, cycle) %&gt;%
  mutate(panel = as_factor(label)) #panel is compound by default

# generate formatted levels
levels(subset_df$panel) &lt;- as.character(latex2exp::TeX(levels(subset_df$panel)))

# plot
p &lt;- base_plot %+% filter(subset_df, TRUE) + 
    facet_wrap(~panel, scales = &quot;free_y&quot;, ncol = 3, labeller = label_parsed) +
    theme(strip.background = element_rect(fill = &quot;gray&quot;), strip.text = element_text(size = 10, hjust = 0.1)) +
    xlab(&quot;DO (mg/L)&quot;)
plot_grid(
  create_image_row_2(subset_df, y_axis_label_width = 0.034, y_axes_width = 0.062), #0.17
  p,
  ncol = 1L,
  rel_heights = c(0.17, 1)
)  
   
 
 
 Figure S34. Cyc 
  subset_df &lt;- ss_data_cyc_6me_DO %&gt;% 
  filter(methyl != &quot;I&quot;) %&gt;% # avoid double-plotting
  bind_rows(ss_data_cyc_5me_DO) %&gt;% 
  mutate(subset = &quot;both&quot;) %&gt;% # to select the correct image 
  mutate(env_var = DO) %&gt;%
  arrange(methyl, pos, cycle) %&gt;%
  mutate(panel = as_factor(label)) #panel is compound by default

# generate formatted levels
levels(subset_df$panel) &lt;- as.character(latex2exp::TeX(levels(subset_df$panel)))

p &lt;- base_plot %+% filter(subset_df, TRUE) + 
    #facet_grid(methyl + pos ~ cycle, scales = &quot;free_y&quot;) + 
    facet_wrap(~panel, scales = &quot;free_y&quot;, ncol = 3, labeller = label_parsed) +
    theme(strip.background = element_rect(fill = &quot;gray&quot;), strip.text = element_text(size = 10, hjust = 0.5)) +
    xlab(&quot;DO (mg/L)&quot;)
plot_grid(
  p,
  create_image_col(subset_df, y_height = 0.2, rel_heights = c(1,2,2)),
  nrow = 1L,
  rel_widths = c(1, 0.16) #0.23
)  
   
 
 
 Figure S35. Isom 
  subset_df &lt;- ss_data_isom_DO %&gt;% 
  mutate(env_var = DO) %&gt;%
  arrange(methyl, pos, cycle) %&gt;%
  mutate(panel = as_factor(label)) #panel is compound by default

# generate formatted levels
levels(subset_df$panel) &lt;- as.character(latex2exp::TeX(levels(subset_df$panel)))

# plot
p &lt;- base_plot %+% filter(subset_df, TRUE) + 
    facet_wrap(~panel, scales = &quot;free_y&quot;, ncol = 3, labeller = label_parsed) +
    theme(strip.background = element_rect(fill = &quot;gray&quot;), strip.text = element_text(size = 10, hjust = 0.1)) +
    xlab(&quot;DO (mg/L)&quot;)
plot_grid(
  create_image_row_2(subset_df, y_axis_label_width = 0.034, y_axes_width = 0.062), #0.17
  p,
  ncol = 1L,
  rel_heights = c(0.18, 1)
)  
   
 
 
 Figure S36. Meth-Isom 
  subset_df &lt;- ss_data_mi_DO %&gt;% 
  mutate(env_var = DO) %&gt;%
  arrange(methyl, pos, cycle) %&gt;%
  mutate(panel = as_factor(label)) #panel is compound by default

# generate formatted levels
levels(subset_df$panel) &lt;- as.character(latex2exp::TeX(levels(subset_df$panel)))

# plot
p &lt;- base_plot %+% filter(subset_df, TRUE) + 
    facet_wrap(~panel, scales = &quot;free_y&quot;, ncol = 3, labeller = label_parsed) +
    theme(strip.background = element_rect(fill = &quot;gray&quot;), strip.text = element_text(size = 10, hjust = 0.1)) +
    xlab(&quot;DO (mg/L)&quot;)
plot_grid(
  create_image_row_2(subset_df, y_axis_label_width = 0.03, y_axes_width = 0.05), #0.17
  p,
  ncol = 1L,
  rel_heights = c(0.15, 1)
)  
   
 
 
 Figure S37. Cyc-Isom 
  # 12x8 output without schematics
subset_df &lt;- ss_data_ci_DO %&gt;%
  mutate(env_var = DO) %&gt;%
  arrange(methyl, pos, cycle) %&gt;%
  mutate(panel = as_factor(label)) #panel is compound by default

# generate formatted levels
levels(subset_df$panel) &lt;- as.character(latex2exp::TeX(levels(subset_df$panel)))

p &lt;- base_plot %+% filter(subset_df, TRUE) + 
    facet_wrap(~panel, scales = &quot;free_y&quot;, ncol = 3, labeller = label_parsed) +
    theme(strip.background = element_rect(fill = &quot;gray&quot;), strip.text = element_text(size = 10, hjust = 0.5)) +
    xlab(&quot;DO (mg/L)&quot;)
plot_grid(
  p,
  create_image_col(subset_df, y_height = 0.2, rel_heights = c(1,2,2)),
  nrow = 1L,
  rel_widths = c(1, 0.16)
)  
   
 
 
 Figure S38. Meth-Cyc 
  subset_df &lt;- ss_data_mc_6me_noI_DO %&gt;%
  bind_rows(ss_data_mc_5me_DO) %&gt;% 
  mutate(env_var = DO) %&gt;%
  arrange(pos, methyl, cycle) %&gt;%
  mutate(panel = as_factor(label)) #panel is compound by default

# generate formatted levels
levels(subset_df$panel) &lt;- as.character(latex2exp::TeX(levels(subset_df$panel)))

p &lt;- base_plot %+% filter(subset_df, TRUE) + 
    facet_wrap(~panel, scales = &quot;free_y&quot;, ncol = 3, labeller = label_parsed) +
    theme(strip.background = element_rect(fill = &quot;gray&quot;), strip.text = element_text(size = 10, hjust = 0.5)) +
    xlab(&quot;DO (mg/L)&quot;)
plot_grid(
  p,
  create_image_col(subset_df, y_height = 0.2, rel_heights = c(3,2,0.9)),
  nrow = 1L,
  rel_widths = c(1, 0.16)
)  
   
 
 
 Figure S39. Full 
  subset_df &lt;- ss_data_full_DO %&gt;% 
  mutate(env_var = DO) %&gt;%
  arrange(methyl, pos, cycle) %&gt;%
  mutate(panel = as_factor(label)) #panel is compound by default

# generate formatted levels
levels(subset_df$panel) &lt;- as.character(latex2exp::TeX(levels(subset_df$panel)))

# plot
p &lt;- base_plot %+% filter(subset_df, TRUE) + 
    facet_wrap(~panel, scales = &quot;free_y&quot;, ncol = 3, labeller = label_parsed) +
    theme(strip.background = element_rect(fill = &quot;gray&quot;), strip.text = element_text(size = 10, hjust = 0.1)) +
    xlab(&quot;DO (mg/L)&quot;)
plot_grid(
  create_image_row_2(subset_df, y_axis_label_width = 0.045, y_axes_width = 0), #0.17
  p,
  ncol = 1L,
  rel_heights = c(0.12, 1)
)  
   
 
 


 
 

 

 

 

 

 
 

 

 
 

 
 
