# Supplementary material for: Revised fractional abundances and warm-season temperatures substantially improve brGDGT calibrations in lake sediments
Source: Copernicus journal article supplement (doi:10.5194/bg-2021-16), 2021-01-28
Supplement: Supplementary file 1 [file bg-2021-16-supplement-version4.zip › supplemental_data.xlsx]

## Sheet: Readme
This file contains all data used in the study entitled,
"Revised fractional abundances and warm-season temperatures substantially improve brGDGT calibrations in lake sediments"
by Raberg et al. (2021)
The file contains the following data:
Identifying data (columns "Lake" to "Surface Area (km^2)"):
Names, regions, references, coordinates, maximum depths (m), and approximate surface areas (km^2)
Temperature data (columns "MAT (°C)" to "Seasonality (°C)"):
Air temperature variables are defined in the main text.
Abbreviations are: Mean annual temperature (MAT); mean air temperature of months above freezing (MAF); warmest month temperature (WMT); mean summer temperature (MST); summer warmth index (SWI)
Lake water chemistry data (columns "Conductivity (uS/cm)" to "DO min (mg/L)")
Lake water chemistry variables. "DO min" is the minimum measured dissolved oxygen concentration; "DO mean" is the mean measured dissolved oxygen concentration.
Lipid Data (columns "fIa_full" to "fIIIc_prime_full"):
brGDGT fractional abundances as calculated using the standard Full structural set (main text Fig. 2g)
For example, "fIIa_prime_full" is the fractional abundance of brGDGT-IIa' calculated in the Full set.

## Sheet: Data
Lake	Region	Reference	Latitude	Longitude	Max Depth (m)	Surface Area (km^2)	MAT (°C)	MAF (°C)	WMT (°C)	MST (°C)	SWI (°C)	Seasonality (°C)	Conductivity (uS/cm)	pH	DO_mean (mg/L)	DO_min (mg/L)	fIa_full	fIb_full	fIc_full	fIIa_full	fIIa_prime_full	fIIb_full	fIIb_prime_full	fIIc_full	fIIc_prime_full	fIIIa_full	fIIIa_prime_full	fIIIb_full	fIIIb_prime_full	fIIIc_full	fIIIc_prime_full
Qaupat	Canada	This study (Raberg et al., 2021)	63.6777	-68.1977	9.6	0.0822	-8.94445	6.53363	9.75878	7.7806	26.1345	13.381	14.0244	6.74111	10.6484		0.146024	0.0108711	0.00180143	0.273292	0.0652039	0.00958804	0.00410747	0.00209012	4.99239e-05	0.412555	0.0675602	0.00176895	0.00466071	0.000396492	3.11452e-05
Brother of Fog	Canada	This study (Raberg et al., 2021)	67.193	-63.1382	15.8	0.161	-10.7075	5.04287	8.1553	5.04287	15.1286	12.248	12.4539	5.26129	9.38017	0.55	0.147388	0.0112492	0.00238022	0.229668	0.098913	0.0184466	0.00855387	0.00682168	6.17719e-05	0.3676	0.0880907	0.00791761	0.00917502	0.00342075	0.000312963
Clyde Forelands 8	Canada	This study (Raberg et al., 2021)	70.5582	-68.9497	9.4	0.045	-12.1919	3.90349	5.97881	3.90349	11.7105	12.9514	9.60909	5.38091	11.0923	5.81	0.151564	0.00651063	0.000755257	0.276332	0.0819685	0.0122719	0.00724527	0.00109566	3.42277e-05	0.402477	0.051947	0.00181347	0.00557837	0.000403511	3.45454e-06
Clyde Forelands 3	Canada	This study (Raberg et al., 2021)	70.5327	-68.3685	7	0.065	-12.875	3.43333	5.5	3.43333	10.3	13.4884	57.125	6.18875	11.2662		0.131382	0.00434494	0.000675264	0.227511	0.0728314	0.00945615	0.0010482	0.00151465	0	0.48897	0.0559466	0.00238848	0.00301829	0.000913531	0
Spot	Canada	This study (Raberg et al., 2021)	70.5614	-68.9626	12.5	0.014	-12.243	3.85245	5.92777	3.85245	11.5573	12.9514	11.9036	5.52589	11.0289	0.68	0.0867999	0.00382204	9.9819e-05	0.198043	0.0342827	0.0127015	0.000470856	0.00101722	0	0.624496	0.0293131	0.00338095	0.00557335	0	0
Africa Lake	Canada	This study (Raberg et al., 2021)	72.4195	-77.4447	11	0.194	-18.0833	0.6	0.6	-0.933333	0.6	13.5403	2.01304	5.99217	10.9217		0.0685747	0.00390182	7.84028e-06	0.183707	0.0638904	0.00396176	0.000259133	0.00043773	0	0.621964	0.0518435	0.00117044	0.000117359	0.000164286	0
Birch	Canada	This study (Raberg et al., 2021)	66.8002	-63.9708	12.8	0.17	-10.1632	6.22238	11.3696	7.82284	24.8895	14.122	272.775	3.82979	10.8203	7.4	0.191128	0.00786314	0.00114029	0.393894	0.020633	0.0110033	0.00144811	0.0022348	0	0.343382	0.022079	0.00160939	0.00294808	0.000637466	0
Arnuiq	Canada	This study (Raberg et al., 2021)	66.8413	-63.8274	6.9	0.053	-10.1977	6.18788	11.335	7.78834	24.7515	14.122	69.1429	5.45143	7.13714	4.6	0.133803	0.00501197	0.000620645	0.296747	0.0911595	0.00841746	0.00238347	0.00136017	1.3367e-05	0.394907	0.0606935	0.00219169	0.00234796	0.00030517	3.80968e-05
Ataata	Canada	This study (Raberg et al., 2021)	70.5634	-68.9716	9.5	0.057	-12.2785	3.81696	5.89227	3.81696	11.4509	12.9514	10.0273	5.14907	9.19235	0.08	0.126592	0.00655291	0.000201763	0.226503	0.0296365	0.00548994	0.000706368	0.00109635	0	0.575991	0.0204549	0.00167609	0.0048568	0.000242785	0
3 Lakes North	Canada	This study (Raberg et al., 2021)	58.1006	-68.4644	21.5	0.442	-5.35	7.24	11.9	10.0333	36.2	13.2374	47.6921	6.82526	7.88342	4.69	0.145086	0.0161373	0.00449664	0.206975	0.110747	0.0208112	0.0161987	0.00429615	0.0010121	0.347774	0.113043	0.00661209	0.00454251	0.00134993	0.000918119
Loon Lake	Canada	This study (Raberg et al., 2021)	72.5959	-77.9764	9.5	0.162	-14.1917	5.46667	7.8	5.46667	16.4	15.4199					0.154767	0.0122847	0.00274859	0.246553	0.09206	0.0207756	0.00521031	0.00367349	6.62461e-05	0.376772	0.0742752	0.00493001	0.00438949	0.00139464	9.91176e-05
Middle Lake	Canada	This study (Raberg et al., 2021)	64.3086	-69.8608	4.42	1.069	-9.60833	5.025	8.8	6.1	20.1	13.0079					0.100034	0.0203102	0.00391362	0.115774	0.0981795	0.0426447	0.0254579	0.00617124	0.0031241	0.30627	0.198503	0.0370678	0.0215008	0.00888211	0.0121679
Ledge Lake	Canada	This study (Raberg et al., 2021)	64.6956	-70.0988	8.74	0.432	-9.74167	5.025	9	6.23333	20.1	13.0348					0.262527	0.00804288	0.000775831	0.277346	0.0955132	0.00913069	0.00205213	0.00134307	4.06749e-06	0.308562	0.0240714	0.00282296	0.00736644	0.000436064	6.24365e-06
Burton Lake	Canada	This study (Raberg et al., 2021)	63.6688	-68.1657	9	0.118	-9.02369	6.4544	9.67955	7.70136	25.8176	13.8926					0.144181	0.0143969	0.0036265	0.227583	0.0906509	0.0178425	0.00532504	0.00459537	0.000103586	0.406697	0.075627	0.00465077	0.00350141	0.00116282	5.68526e-05
Kekerturnak Lake	Canada	This study (Raberg et al., 2021)	67.8572	-64.8753	15	0.098	-10.0583	3.425	7	4.3	13.7	11.9236		5.82			0.271505	0.0108739	0.00110413	0.320783	0.068483	0.00889056	0.00364794	0.00145693	2.03341e-05	0.266444	0.0381904	0.00233698	0.00565175	0.000561486	5.14698e-05
South America Lake	Canada	This study (Raberg et al., 2021)	66.4365	-64.7283	71	3.95	-10.277	5.16405	7.88637	6.28532	20.6562	13.4473					0.128797	0.00428702	0.000478443	0.271277	0.0564835	0.00610545	0.00146719	0.00116835	5.5295e-06	0.483702	0.0418263	0.00301167	0.00091785	0.000473454	0
Kivitoo Highlands Lake	Canada	This study (Raberg et al., 2021)	68.0003	-64.9891	3.5	0.06	-10.0583	3.425	7	4.3	13.7	11.9236	31.2	6.225	12.7125		0.0863647	0.00194392	0.000183314	0.198174	0.0434741	0.00430445	0.00392917	0.000292824	5.03113e-06	0.619955	0.0370959	0.00154319	0.0026168	6.36537e-05	5.31873e-05
Svinavatn	Iceland	This study (Raberg et al., 2021)	64.94	-22.2341	11.2	0.23	2.5	5.45714	9	8.33333	38.2	4.38595	31.8826	6.74913	10.5057		0.117024	0.0215989	0.00718475	0.222057	0.102387	0.0281042	0.0140177	0.00624485	0.000739731	0.34388	0.125437	0.00608161	0.00379437	0.000928495	0.000519923
Systravatn	Iceland	This study (Raberg et al., 2021)	63.7903	-18.0664	13	0.26	4.8	4.8	10.5	9.93333	57.6	3.82571	71.604	7.3648	10.4332		0.126761	0.0413796	0.0103295	0.241766	0.107434	0.0283815	0.0141634	0.00542019	0.000891497	0.312306	0.101478	0.00421438	0.00412953	0.000755615	0.000588595
Stóra Viðarvatn	Iceland	This study (Raberg et al., 2021)	66.2356	-15.8331	48	2.51	0.7	4.33333	6.9	6.2	26	4.16969	52.9744	7.4839	11.4235	10.62	0.0614458	0.00807142	0.00317474	0.119382	0.0913781	0.0186482	0.0122664	0.00275679	0.00115008	0.44486	0.22102	0.00671951	0.00695109	0.000638247	0.00153732
Heiðarvatn	Iceland	This study (Raberg et al., 2021)	64.9016	-14.5975	15.1	0.16	1.5	4.78333	7.1	6.4	28.7	3.81226	27.1475	6.92275	8.40425	0	0.130566	0.016151	0.00448615	0.203114	0.0798223	0.0179748	0.0088327	0.00399672	0.000479619	0.436465	0.0892484	0.0043566	0.00353237	0.000696429	0.000278628
Litla Viðarvatn	Iceland	This study (Raberg et al., 2021)	66.2402	-15.8036	2.5	0.21	1.7	5.3	7.7	7.1	31.8	4.10524	68.6718	6.67209	9.98218	4.63	0.144595	0.0256393	0.00779402	0.240796	0.109168	0.0280007	0.0209945	0.00537438	0.00240262	0.300205	0.103561	0.00514361	0.00471093	0.000734829	0.000879256
Torfavatn	Iceland	This study (Raberg et al., 2021)	64.8207	-23.1631	3.4	0.48	4.3	4.73636	10.4	9.7	52.1	4.07182	46.8125	6.72875	11.39		0.154206	0.0331949	0.00805416	0.260455	0.0936338	0.0471284	0.0155047	0.00663487	0.000559661	0.272619	0.0971508	0.00663393	0.00328487	0.000635557	0.00030456
Högnavatn	Iceland	This study (Raberg et al., 2021)	65.7467	-22.1645	1.7	0.34	0.9	4.9	7.8	7.03333	29.4	4.60175	22.7	5.935	11.94		0.148614	0.0149128	0.0034557	0.22443	0.091666	0.0241259	0.00461451	0.00604342	7.66947e-05	0.367213	0.107478	0.00417296	0.00254031	0.000647179	8.72776e-06
Berufjarðarvtn	Iceland	This study (Raberg et al., 2021)	65.5514	-22.1087	2.9	0.17	2.8	5.84286	9.5	8.73333	40.9	4.4892	68.0818	6.64273	11.5518		0.115722	0.0233306	0.00504736	0.23953	0.115239	0.036553	0.0139191	0.00407708	0.00083666	0.326006	0.109971	0.00563818	0.0030009	0.000593688	0.000536729
Margaretarvatn	Iceland	This study (Raberg et al., 2021)	65.7766	-22.185	2	0.45	0.9	4.9	7.8	7.06667	29.4	4.61686	26.9	5.77	11.97		0.145996	0.0117718	0.00220932	0.226817	0.0933787	0.0220947	0.0046323	0.00430682	0.000245123	0.372137	0.106601	0.0049348	0.00408482	0.00069387	9.69593e-05
Leirvogsvatn	Iceland	This study (Raberg et al., 2021)	64.1961	-21.4536	15.1	1.2	3.7	5.8	10	9.26667	46.4	4.21609	44.0194	6.94774	10.7661		0.133369	0.0230955	0.00737019	0.236736	0.0927327	0.0279657	0.0118145	0.00523565	0.000485765	0.34975	0.101969	0.00585473	0.0025706	0.000664143	0.000387439
Skjaldarvatn	Iceland	This study (Raberg et al., 2021)	65.0465	-22.7915	1.1	0.11	3.9	6.125	10.2	9.6	49	4.28708	109.425	6.8875	9.9125		0.122004	0.0258768	0.00534819	0.220108	0.122679	0.0561114	0.0181293	0.00559973	0.000980383	0.272616	0.136074	0.00849207	0.00467964	0.000726607	0.000575723
Másvatn	Iceland	This study (Raberg et al., 2021)	65.6405	-17.2485	17	3.77	2	4.97143	8.5	7.83333	34.8	4.3535	59.2056	7.54222	10.4161		0.0764492	0.0176309	0.00667957	0.154846	0.100192	0.0547746	0.0187447	0.00472423	0.000778074	0.356792	0.189693	0.0107414	0.00630514	0.000676869	0.000972519
Miðheiðarvatn West	Iceland	This study (Raberg et al., 2021)	65.5528	-21.7926	3.4	0.13	1.2	5.2	8.1	7.33333	31.2	4.60175	22.9	6.26571	11.2557		0.0891304	0.0146492	0.00419779	0.215659	0.0645633	0.0352506	0.00410427	0.00492445	0.000172577	0.468111	0.0889268	0.00619619	0.00296332	0.000926722	0.000224262
Sauravatn	Iceland	This study (Raberg et al., 2021)	65.014	-22.7187	10.5	0.22	3.8	6.075	10.2	9.53333	48.6	4.29555	57.8381	6.70095	11.2514		0.127791	0.0223509	0.00787751	0.207014	0.125965	0.0433836	0.0183241	0.00753679	0.000570026	0.300988	0.126501	0.00687196	0.00344778	0.00113611	0.000242992
Miðheiðarvatn East	Iceland	This study (Raberg et al., 2021)	65.5538	-21.7805	14.3	0.19	1	4.93333	7.7	7.03333	29.6	4.59258	28.6667	6.35633	11.2		0.153895	0.0237297	0.0113782	0.204147	0.0649929	0.0416964	0.00658679	0.0162587	0.00035814	0.359151	0.0988075	0.00958084	0.00302688	0.00595131	0.000439359
Vestra Gísholtsvatn	Iceland	This study (Raberg et al., 2021)	63.9433	-20.5241	15	1.35	4.7	4.7	10.3	9.7	56.4	3.73469	80.8667	7.10815	10.557		0.102068	0.0261612	0.00747609	0.17474	0.128748	0.0349872	0.0353676	0.00496768	0.00312193	0.267627	0.194845	0.00700906	0.0101242	0.000625003	0.00213186
Bæjarvötn	Iceland	This study (Raberg et al., 2021)	65.7207	-21.4332	23	0.65	2.4	5.51429	9.1	8.43333	38.6	4.55412	77.792	7.4			0.0860305	0.0184303	0.0115756	0.238211	0.0123381	0.0414877	0.00197496	0.0158831	0.000185581	0.513045	0.0408399	0.00930042	0.0058459	0.00442108	0.000430866
Haukadalsvatn	Iceland	This study (Raberg et al., 2021)	65.0511	-21.6305	42	2.95	3.6	5.9125	10.2	9.43333	47.3	4.38582	71.276	7.7			0.195215	0.0272519	0.0109136	0.398283	0.116983	0.0175639	0.00624588	0.0055258	0.000527867	0.178428	0.0377987	0.00292238	0.00127043	0.000844515	0.000225646
Torfdalsvatn	Iceland	This study (Raberg et al., 2021)	66.0605	-20.3829	5.8	0.41	2.2	5.34286	9	8.3	37.4	4.63266	119.3	6.96375	9.64159	2.8	0.145166	0.0155869	0.00341461	0.310392	0.150102	0.0276793	0.006552	0.00383617	0.000467031	0.242984	0.0857229	0.00529469	0.00204973	0.000567689	0.000185209
Svartárgilsvatn	Iceland	This study (Raberg et al., 2021)	65.9071	-21.8215		0.6	1.1	5.15	8	7.3	30.9	4.68507					0.0925855	0.00799149	0.00235059	0.231648	0.0988044	0.013584	0.0041684	0.00209649	0.000628996	0.456882	0.0831147	0.00312629	0.00216569	0.000487782	0.000365818
Hvalárvatn	Iceland	This study (Raberg et al., 2021)	66.0607	-21.8673	14.5	0.67	1.1	5.2	8	7.33333	31.2	4.70432					0.114385	0.0112153	0.00804369	0.306298	0.0947822	0.00698117	0.0141849	0.00261999	0.00640761	0.378315	0.0501293	0.00109285	0.00347285	0.000276827	0.0017956
Tröllkonuvatn	Iceland	This study (Raberg et al., 2021)	66.1445	-22.0621	16.4	1.3	1	5.03333	7.8	7.13333	30.2	4.66732					0.0742575	0.00242646	0.000587718	0.229481	0.0765542	0.00334875	0.00364394	0.000601077	0.000558289	0.524973	0.0778651	0.00284089	0.00179131	0.000556998	0.000513766
Skúfnavötn	Iceland	This study (Raberg et al., 2021)	65.8926	-22.1166		0.88	0.5	4.55	7.4	6.7	27.3	4.66583					0.148888	0.0134188	0.00179869	0.307344	0.0822028	0.015938	0.00257208	0.0025001	0.000785019	0.376831	0.0404205	0.0031588	0.0032207	0.00085395	6.84425e-05
Gedduvatn	Iceland	This study (Raberg et al., 2021)	65.7159	-22.1912		0.79	0.7	4.7	7.6	6.83333	28.2	4.60491	26.6	5.58	12.04		0.132195	0.0106524	0.00253071	0.295225	0.114663	0.0160799	0.00407599	0.00451269	0.00102905	0.344125	0.0650725	0.00338805	0.00531098	0.00106362	7.63582e-05
Gripdeild	Iceland	This study (Raberg et al., 2021)	65.207	-15.4454	8	1.7	0.4	3.85	6.4	5.66667	23.1	3.98132	52.2	7.42	11.47		0.0938176	0.024469	0.00518123	0.2395	0.128319	0.0256777	0.0116709	0.00288277	0.000780074	0.334859	0.121018	0.00650491	0.00406729	0.000539702	0.000713098
Skorarvatn	Iceland	This study (Raberg et al., 2021)	66.2557	-22.3253	25	0.2	1.4	5.46667	8.2	7.53333	32.8	4.64663	48.185	7.19667	10.4633		0.1703	0.0125314	0.00403499	0.36822	0.0442437	0.0181312	0.00129886	0.00529472	5.40171e-05	0.331743	0.0382569	0.00272649	0.00201384	0.000949826	0.000201265
Albert	Africa	Russell et al. (2018)	1.683	30.917	58	5660	26.8	26.8	26.8	26.8	321.6	0.673975	770	9		3	0.332237	0.0520254	0.0127555	0.0405165	0.399716	0.00958409	0.03362	0.0017431	0.0021897	0.00883494	0.106778	0	0	0	0
Alice	Africa	Russell et al. (2018)	-0.076	37.465	26.5	0.186	9.6	9.6	9.6	9.6	115.2	0.754381	25	7.4	2.4	2.3	0.159609	0.0198897	0.00495235	0.303788	0.130241	0.0282181	0.0179016	0	0	0.241113	0.0942869	0	0	0	0
Bandasa	Africa	Russell et al. (2018)	-0.157	37.449	0.3	0.00542	12.8	12.8	12.8	12.8	153.6	0.801278	21	8.1	2.5	2.5	0.359434	0.0460868	0.0122801	0.318068	0.105169	0.0219835	0.00732028	0.00671852	0	0.101115	0.0197135	0.000971259	0.00113872	0	0
Batoda	Africa	Russell et al. (2018)	0.3	29.883	14.5	0.0953	4.2	4.2	4.2	4.2	50.4	0.433712	13	5.35	6.6	6	0.158847	0.00520643	0.000517349	0.265035	0.11483	0.0103246	0.000858803	0.00273987	0	0.361293	0.0784675	0.00188033	0	0	0
Bigata	Africa	Russell et al. (2018)	0.307	29.883	18	0.0144	4.2	4.2	4.2	4.2	50.4	0.4324	8	5.8	3.75	0.2	0.189421	0.00355254	0.00117097	0.366618	0.0311207	0.00919557	0.00050967	0.00515275	0	0.368275	0.0232909	0.000870853	0	0.000821789	0
Bugwagi	Africa	Russell et al. (2018)	-0.2	30.183	85	0.602	24	24	24	24	288	0.383761	439	8	3.15	0.3	0.349425	0.155975	0.0212222	0.134697	0.13771	0.0729232	0.0458909	0.00813978	0.00331012	0.0303885	0.0345627	0.00243838	0.00259203	0	0.000725173
Bukurungu East	Africa	Russell et al. (2018)	0.4	29.9	17.3	0.0302	5.4	5.4	5.4	5.4	64.8	0.417424	13	4.05	3.6	0.2	0.224314	0.00498409	0.00275952	0.39168	0.023385	0.0140736	0.000387695	0.00817765	0	0.31784	0.0123976	0	0	0	0
Chibwera	Africa	Russell et al. (2018)	-0.15	30.15	11.7	0.764	24.6	24.6	24.6	24.6	295.2	0.380988	472	8.4	3.9	0.1	0.418181	0.129905	0.0281291	0.112245	0.135842	0.0563691	0.052298	0.00724649	0.00247387	0.0277857	0.0295251	0	0	0	0
Edward	Africa	Russell et al. (2018)	-0.246	29.75	29	2330	25.1	25.1	25.1	25.1	301.2	0.215146	840	8.5	4.25	2	0.266727	0.109972	0.0235334	0.159574	0.157631	0.0941793	0.030372	0.0199333	0.00248925	0.0657303	0.0639708	0.00248874	0.00231783	0.000383569	0.000697306
Eldoret Nakuru 2	Africa	Russell et al. (2018)	0.361	35.351	1.5	0.0005	15.6	15.6	15.6	15.6	187.2	0.875941	171	6.9	3.4	3.4	0.474737	0.0460715	0.00790834	0.158778	0.165742	0.0159098	0.0161948	0	0	0.0690614	0.0455974	0	0	0	0
Enchanted	Africa	Russell et al. (2018)	-0.172	37.336	33.3	0.0487	6.3	6.3	6.3	6.3	75.6	0.793534	32	7.1	6.05	5.9	0.112045	0.0273023	0.00980586	0.239213	0.0649485	0.0794809	0.00449831	0.00958592	0.00958592	0.36105	0.0762511	0.00623314	0	0	0
Gallery Tarn	Africa	Russell et al. (2018)	-0.164	37.325	10.4	0.0171	5.1	5.1	5.1	5.1	61.2	0.806179	13	7	6.3	6.3	0.147218	0.0305844	0.00303333	0.259788	0.155011	0.0293826	0.0251617	0.0110902	0	0.264142	0.0745886	0	0	0	0
Hanging Tarn	Africa	Russell et al. (2018)	-0.156	37.333	7.5	0.00717	5.2	5.2	5.2	5.2	62.4	0.792531	19	7.95	2.7	2.9	0.156794	0.0268551	0.00768592	0.278405	0.0582817	0.072275	0.00218702	0.0135086	0	0.348825	0.0295406	0.00564155	0	0	0
Harris Tarn	Africa	Russell et al. (2018)	-0.151	37.319	7.1	0.00209	3.7	3.7	3.7	3.7	44.4	0.795251	26	8.05	3.25	3.5	0.112615	0.00322008	0.000364642	0.320562	0.0664322	0.00182664	0.00374682	0	0	0.387062	0.102057	0.00143555	0.00067655	0	0
Hausburg Tarn	Africa	Russell et al. (2018)	-0.145	37.301	10.7	0.017	5.6	5.6	5.6	5.6	67.2	0.838243	24	7.7	6.85	7	0.145408	0.0316182	0.0199651	0.327101	0.0307331	0.0895355	0.0033329	0.00956632	0	0.300597	0.0421431	0	0	0	0
Hut Tarn	Africa	Russell et al. (2018)	-0.157	37.299	7.9	0.02	4.9	4.9	4.9	4.9	58.8	0.853691	20	7.05	6.9	6.9	0.165504	0.0169743	0.00532558	0.312437	0.0783973	0.0564009	0.00224891	0.0117254	0	0.295848	0.0551387	0	0	0	0
Ibamba	Africa	Russell et al. (2018)	-0.2	30.2	1.2	0.02	23.8	23.8	23.8	23.8	285.6	0.377692	104	6.6	2.1	0.9	0.57971	0.0618417	0.0147367	0.19142	0.084178	0.0154685	0.00639073	0.00252805	0	0.0343398	0.00938609	0	0	0	0
Irene	Africa	Russell et al. (2018)	0.383	29.883	3.5	0.00016	1.6	1.6	1.6	1.6	19.2	0.420227	7	5.75	6	4.4	0.0725628	0.00213497	3.90965e-05	0.155359	0.0648423	0.00469349	0.000967331	0	0	0.588692	0.11071	0	0	0	0
Kacuba	Africa	Russell et al. (2018)	-0.333	30.017	14.5	0.506	23.5	23.5	23.5	23.5	282	0.309936	183	8.1			0.378457	0.103915	0.0294391	0.128825	0.16699	0.0567833	0.03802	0.00879923	0	0.0366761	0.0520939	0	0	0	0
Kako	Africa	Russell et al. (2018)	-0.3	30.1	29	0.171	21.2	21.2	21.2	21.2	254.4	0.326018	89	7.45	2.85	0	0.410308	0.103425	0.0175626	0.117449	0.192099	0.0354388	0.0493277	0.00400063	0	0.0281295	0.0422597	0	0	0	0
Kamweru	Africa	Russell et al. (2018)	-0.25	30.117	44	0.203	22.5	22.5	22.5	22.5	270	0.35537	158	7.65	3.45	0	0.444803	0.0746601	0.00760081	0.152314	0.18549	0.0223414	0.0294207	0	0	0.0288592	0.0545105	0	0	0	0
Kanyabutetere	Africa	Russell et al. (2018)	0.417	30.283	5	0.28	22.8	22.8	22.8	22.8	273.6	0.377692	401	8.2	2.3	0.4	0.382216	0.104654	0.0221128	0.14793	0.17731	0.0282057	0.0486394	0.00226889	0.0017912	0.0343492	0.0474593	0	0.0030624	0	0
Kanyanchu	Africa	Russell et al. (2018)	0.433	30.317	4.8	0.0072	22.5	22.5	22.5	22.5	270	0.38573	635	8.05	3.5	0.4	0.337313	0.0854796	0.01779	0.0981156	0.227549	0.041803	0.0617719	0.00403089	0.00227968	0.0305548	0.0858461	0.00228372	0.00518269	0	0
Kasirya	Africa	Russell et al. (2018)	-0.25	30.133	43	0.0872	22.3	22.3	22.3	22.3	267.6	0.355477	302	7.65	2.45	0	0.401412	0.106303	0.0153153	0.120006	0.189242	0.0367722	0.0452502	0.00318114	0.00311382	0.0238029	0.0522423	0	0.00335966	0	0
Katanda	Africa	Russell et al. (2018)	0.483	30.267	146	0.367	21.6	21.6	21.6	21.6	259.2	0.405549	426	7.75	3.65	0	0.288527	0.128719	0.0218547	0.0842661	0.206582	0.0516524	0.10543	0.0053408	0.011411	0.0228004	0.0643255	0.00212421	0.00542178	0	0.0015454
Katunda	Africa	Russell et al. (2018)	0.28	29.895	10.5	0.0377	5.5	5.5	5.5	5.5	66	0.448144	14	5.25	6.4	6.4	0.179898	0.0104592	0.00225511	0.307448	0.042789	0.0175626	0.000807788	0.00459961	0	0.356784	0.0753405	0.00205676	0	0	0
Kifuruka	Africa	Russell et al. (2018)	0.483	30.283	4.2	0.13	21.1	21.1	21.1	21.1	253.2	0.3872	359	7.6	3.1	1.1	0.319046	0.080618	0.0105302	0.123041	0.216175	0.0367184	0.0698917	0	0.00282585	0.0416183	0.0942971	0	0.00523827	0	0
Kisibendi	Africa	Russell et al. (2018)	0.383	30.3	4.5	0.0477	23.3	23.3	23.3	23.3	279.6	0.36546	277	7.75	2.85	0	0.414471	0.0487926	0.00504761	0.102388	0.297372	0.0112843	0.0307569	0	0	0.0340096	0.0558785	0	0	0	0
Kitere	Africa	Russell et al. (2018)	0.4	30.25	51	0.098	23.1	23.1	23.1	23.1	277.2	0.396194	711	8.05	2	0	0.353738	0.108001	0.00871733	0.066727	0.25285	0.0315142	0.091899	0.00224529	0.00246286	0.0181723	0.0599689	0	0.00370374	0	0
Kopello	Africa	Russell et al. (2018)	0.31	29.892	14.1	0.0301	4	4	4	4	48	0.435542	9	5.2	5.7	3.1	0.161051	0.00268525	0.000863121	0.346956	0.0359525	0.00703679	0.000686613	0.00407929	0	0.414858	0.023652	0.000770685	0	0.000761556	0.000647511
Kyasunduka	Africa	Russell et al. (2018)	-0.283	30.042	2	0.503	24.3	24.3	24.3	24.3	291.6	0.336087	260	8.8	2.45	0.8	0.388328	0.13412	0.0105696	0.0633389	0.203334	0.0454356	0.0777912	0.00285912	0	0.0180359	0.0526461	0	0.00354251	0	0
Kyerbwato	Africa	Russell et al. (2018)	0.433	30.317	14.1	0.0144	22.5	22.5	22.5	22.5	270	0.38573	464	8.25	3.8	1.3	0.392929	0.116952	0.0218097	0.0922464	0.189445	0.0524987	0.0458807	0.0081828	0.00224058	0.0226489	0.0501707	0.00200923	0.0029861	0	0
Kyogo	Africa	Russell et al. (2018)	-0.333	30.017	3.4	0.018	23.5	23.5	23.5	23.5	282	0.309936	56	6.85	3.2	3.1	0.532592	0.0925075	0.0109439	0.137924	0.130346	0.0183109	0.0368901	0.00300899	0.00132129	0.018642	0.0157195	0.000511633	0.00128337	0	0
Ellis	Africa	Russell et al. (2018)	-0.124	37.401	15.5	0.108	10.1	10.1	10.1	10.1	121.2	0.773226	41	7.35	5.15	4.2	0.222765	0.0836634	0.0227764	0.234656	0.0738387	0.123007	0.0319515	0.0163256	0.00294236	0.144727	0.0342065	0.00644755	0.00269257	0	0
Large Hall Tarn	Africa	Russell et al. (2018)	-0.143	37.346	8.2	0.00934	6	6	6	6	72	0.76411	10	7.05	6.45	6.7	0.230361	0.0249331	0.00746269	0.294278	0.11387	0.0300665	0.00202251	0.00821433	0	0.233091	0.0557004	0	0	0	0
Lewis Tarn	Africa	Russell et al. (2018)	-0.162	37.311	16.3	0.0163	4.5	4.5	4.5	4.5	54	0.817378	23	6.35	6.15	5.2	0.159508	0.0266452	0.00337198	0.29988	0.053835	0.0338603	0.00177648	0.00480142	0	0.336821	0.0746878	0.00231146	0.00250162	0	0
Lower Simba	Africa	Russell et al. (2018)	-0.145	37.319	3	0.000844	5.4	5.4	5.4	5.4	64.8	0.819599	33	7.65	7.6	7.6	0.152659	0.0190749	0.00425921	0.324514	0.0414681	0.105442	0.00430782	0	0	0.272618	0.0756568	0	0	0	0
Mahoma	Africa	Russell et al. (2018)	0.346	29.968	13.2	0.0476	10	10	10	10	120	0.434497	13	5.75	3.25	0.3	0.338363	0.00829201	0.00365658	0.372038	0.0328041	0.00827109	0.000785371	0.00322866	0	0.223446	0.00911524	0	0	0	0
Mahuhura	Africa	Russell et al. (2018)	0.433	30.267	70	0.186	20.5	20.5	20.5	20.5	246	0.391868	603	8.5	1.8	0	0.153594	0.0901741	0.00608251	0.274221	0.117104	0.0662438	0.00196607	0.00223334	0	0.186188	0.0991096	0.00308441	0	0	0
Mbajo	Africa	Russell et al. (2018)	0.45	30.267	35	0.08	22.5	22.5	22.5	22.5	270	0.389541	504	7.75	1.8	0	0.303163	0.117533	0.0225872	0.0903577	0.208331	0.0449789	0.0986645	0.00457778	0.00857687	0.0225043	0.069249	0.00170942	0.00620015	0	0.00156753
Mbugo	Africa	Russell et al. (2018)	-0.167	30.15	2.6		24.5	24.5	24.5	24.5	294	0.388763	214	9.55	3.35	1.5	0.365591	0.0856562	0.0087837	0.172661	0.166513	0.0290896	0.0589197	0	0	0.0546759	0.0581097	0	0	0	0
Middle Kachope	Africa	Russell et al. (2018)	0.333	29.867	3.3	0.0101	5.1	5.1	5.1	5.1	61.2	0.425245	25	6.75	7.1	6.6	0.129301	0.0145216	0.00280304	0.240797	0.0503548	0.0178725	0.00265807	0.003193	0	0.439735	0.0971236	0.00164096	0	0	0
Mirambi	Africa	Russell et al. (2018)	-0.217	30.1	21.3	0.53	23.7	23.7	23.7	23.7	284.4	0.375278	626	8.65	4.45	0	0.384324	0.147671	0.0123971	0.131992	0.151036	0.0587896	0.0416072	0	0	0.0387419	0.0334403	0	0	0	0
Murabio	Africa	Russell et al. (2018)	-0.35	30.033	15	0.16	23.6	23.6	23.6	23.6	283.2	0.314667	718	7.6	2	0	0.442127	0.105873	0.0224361	0.0711758	0.19508	0.0296292	0.0576593	0.00424431	0.00194721	0.0193385	0.0464584	0.00105249	0.00297907	0	0
Murusi	Africa	Russell et al. (2018)	0.433	30.283	60	0.214	22.5	22.5	22.5	22.5	270	0.377692	374	7.55	3.55	0.1	0.405697	0.120556	0.017377	0.13162	0.161999	0.0509121	0.0396397	0.00443884	0.00226853	0.0291008	0.0331379	0.00143439	0.00181803	0	0
Mwengenyi	Africa	Russell et al. (2018)	0.483	30.267	140	0.294	21.2	21.2	21.2	21.2	254.4	0.405549	356	7.75	3.15	0	0.302456	0.111293	0.0280944	0.132061	0.191703	0.0574627	0.0534505	0.00896318	0.0042765	0.0389074	0.0642138	0.00306134	0.00336154	0	0.0006955
Nanyuki Tarn	Africa	Russell et al. (2018)	-0.155	37.297	5.3	0.00769	5	5	5	5	60	0.853691	14	6.7	6.6	6.7	0.136243	0.0525861	0.0283265	0.27704	0.0410361	0.123738	0.00851963	0.026372	0	0.23917	0.0564477	0.0105216	0	0	0
Njarayabana	Africa	Russell et al. (2018)	0.433	30.25	37	0.122	22.9	22.9	22.9	22.9	274.8	0.395428	861	8.3	3.1	0.1	0.30352	0.100275	0.010289	0.114096	0.25677	0.0392296	0.0607349	0.00158809	0.00291917	0.0367845	0.068516	0.00181795	0.00346094	0	0
Nkugute	Africa	Russell et al. (2018)	-0.317	30.1	58	0.89	21.1	21.1	21.1	21.1	253.2	0.321926	103	7.25	3.7	0	0.4153	0.0861629	0.00990194	0.145724	0.182735	0.024517	0.0431527	0	0	0.0424422	0.0500644	0	0	0	0
Nkuruba	Africa	Russell et al. (2018)	0.517	30.3	34	0.0132	20.5	20.5	20.5	20.5	246	0.405549	352	7.5	3	0.2	0.345702	0.0874887	0.0158814	0.106739	0.227794	0.0375068	0.056802	0.00278405	0.00449613	0.028257	0.0794424	0.00197059	0.00412546	0	0.00100963
Nyamswiga	Africa	Russell et al. (2018)	0.517	30.283	39.5	0.0292	20.7	20.7	20.7	20.7	248.4	0.38808	320	7.8	1.9	0	0.330207	0.0978723	0.0178769	0.13098	0.211392	0.0432349	0.0507217	0	0	0.039403	0.0783133	0	0	0	0
Nyamugosani	Africa	Russell et al. (2018)	0.417	30.233	36.7	0.114	22.5	22.5	22.5	22.5	270	0.387298	981	8.65	3.25	0.2	0.30496	0.113608	0.0172193	0.112043	0.217929	0.0459504	0.0724753	0.00263113	0.00384857	0.0339507	0.067791	0.00318336	0.00440969	0	0
Nyamusingere	Africa	Russell et al. (2018)	-0.283	30.033	4.5	3.84	24.5	24.5	24.5	24.5	294	0.35537	749	9.15	4.55	1.9	0.34653	0.135792	0.0124431	0.0547926	0.225792	0.0271629	0.109933	0.00430786	0.00363966	0.0146303	0.059458	0	0.00551806	0	0
Nyantonde	Africa	Russell et al. (2018)	0.483	30.283	180	0.125	21.2	21.2	21.2	21.2	254.4	0.3872	438	7.85	3.45	0	0.326598	0.0948943	0.012238	0.102197	0.24183	0.0427285	0.0705514	0.00295212	0.00477322	0.0254733	0.0690376	0.00199352	0.0037614	0	0.000971965
Oblong Tarn	Africa	Russell et al. (2018)	-0.144	37.301	3.4	0.0113	5.6	5.6	5.6	5.6	67.2	0.838243	25	6.75	6.35	6.6	0.146149	0.0208399	0.00870248	0.336501	0.029946	0.0633774	0.00413428	0	0	0.33909	0.0512598	0	0	0	0
Ruhandika	Africa	Russell et al. (2018)	0.383	29.883	3	9e-05	2.4	2.4	2.4	2.4	28.8	0.420227	5	6.05	6	4.4	0.119395	0.0038512	0.000375533	0.214134	0.0863325	0.00379189	0.00350107	0	0	0.480636	0.0879829	0	0	0	0
Rutundu	Africa	Russell et al. (2018)	-0.042	37.464	10.8	0.0801	12	12	12	12	144	0.74116	34	7.6	2.35	2.3	0.258276	0.0928893	0.0388617	0.252644	0.0577991	0.109263	0.00857461	0.0268142	0	0.137858	0.0170208	0	0	0	0
Small Hall Tarn	Africa	Russell et al. (2018)	-0.144	37.345	2.8	0.00358	6	6	6	6	72	0.76411	11	7.3	7	7	0.19317	0.0155341	0.00426152	0.261621	0.117606	0.0209474	0.00598997	0.0044534	0	0.305967	0.0674322	0.00136322	0.00165374	0	0
Square Tarn	Africa	Russell et al. (2018)	-0.154	37.323	3	0.000475	4.1	4.1	4.1	4.1	49.2	0.795251	18	5.6	6.95	5.9	0.169359	0.00328747	0.00106972	0.284166	0.150019	0.00398412	0.00300731	0	0	0.228355	0.156752	0	0	0	0
Tanganyika	Africa	Russell et al. (2018)	-4.872	29.617	110	32600	23.8	23.8	23.8	23.8	285.6	0.540132	680	8.95	4.75	2.3	0.318785	0.0864137	0.0350629	0.0485311	0.275331	0.029503	0.0531547	0.00769792	0.0118314	0.0201879	0.107654	0.00201342	0.00247174	0	0.00136169
Teleki Tarn	Africa	Russell et al. (2018)	-0.169	37.306	7.9	0.0419	6	6	6	6	72	0.818489	18	6.7	7.55	7.4	0.169544	0.0613879	0.0163917	0.223786	0.0496312	0.208529	0.00649276	0.0223463	0	0.17191	0.0699812	0	0	0	0
Thompson	Africa	Russell et al. (2018)	-0.168	37.32	4.8	0.00589	5.8	5.8	5.8	5.8	69.6	0.81515	36	7.2	6.7	6.9	0.131621	0.0202016	0.00649072	0.231319	0.068716	0.0545408	0.00433873	0	0	0.377398	0.105374	0	0	0	0
Veggie Tarn	Africa	Russell et al. (2018)	-0.144	37.344	1.5	0.00427	6	6	6	6	72	0.76411	13	7.25	7	7	0.115863	0.0136124	0.00344294	0.229111	0.0995121	0.0211999	0.00292523	0.00250357	0	0.442788	0.0672227	0.00181961	0	0	0
Wandakara	Africa	Russell et al. (2018)	0.417	30.267	12	0.0308	23.1	23.1	23.1	23.1	277.2	0.4048	1225	8.35	2.75	0	0.359208	0.0882986	0.00908315	0.0753108	0.252013	0.0291817	0.0804141	0	0.00405206	0.0209833	0.0766043	0	0.00485096	0	0
Wankenzi	Africa	Russell et al. (2018)	0.425	30.267	90	0.165	23.1	23.1	23.1	23.1	277.2	0.4048	394	7.65	4.2	0.2	0.361182	0.0893645	0.00910924	0.0734909	0.252436	0.0286412	0.0813269	0.00171258	0.00360369	0.020187	0.0717524	0.00181222	0.00468747	0	0.000693953
Alzasca, Lago d'	Central Europe	Weber et al. (2018)	46.266	8.58529	40	0.10419	2.589	6.74992	10.7339	10.0501	47.2494	6.01794					0.134933	0.0131673	0.00298456	0.261585	0.10802	0.0152877	0.0343187	0.00287383	0.000305522	0.299807	0.107683	0.00383538	0.0136862	0.000727418	0.000785512
Baldeggersee	Central Europe	Weber et al. (2018)	47.2053	8.25646	66	5.2	9.46964	9.44105	18.6808	17.8015	113.293	6.75776	387.598	7.88535	8.03669	5.17475	0.106712	0.0600193	0.0114147	0.149169	0.124378	0.0992544	0.0476192	0.00478267	0.00432311	0.262978	0.105503	0.0125383	0.00840752	0.00115605	0.00174512
Cadagno, Lago di	Central Europe	Weber et al. (2018)	46.5497	8.71202	21	0.26	2.24817	7.43436	10.3629	9.66614	44.6062	5.98129	282.975	7.56944	4.51111	0.1	0.098784	0.0386917	0.00964209	0.0936035	0.147942	0.0600155	0.0595954	0.00568201	0.00463688	0.153657	0.293745	0.0112982	0.0175064	0.00213779	0.0030624
Cama, Lago di	Central Europe	Weber et al. (2018)	46.2549	9.22714	16	0.131122	5.50821	7.9862	14.1575	13.3387	71.8758	6.33182					0.253767	0.0298153	0.00522432	0.323148	0.0536645	0.0229174	0.00619637	0.00433222	0.000314362	0.2566	0.0393999	0.00232822	0.00103323	0.000864162	0.000395717
Canovasee	Central Europe	Weber et al. (2018)	46.7463	9.45073	10	0.02	7.92359	8.67241	16.9155	16.0598	95.3965	6.59153					0.143399	0.0731647	0.0106573	0.15399	0.175277	0.0991914	0.0674893	0.00575585	0.00326042	0.119649	0.1163	0.0159713	0.0141803	0.000688557	0.00102716
Dosso, Lago	Central Europe	Weber et al. (2018)	46.4493	9.20488	6	0.021822	3.58182	7.83597	11.8146	11.1686	54.8518	6.12469					0.219564	0.0520114	0.0139852	0.251851	0.0824297	0.0640614	0.0243355	0.00597662	0.00126706	0.187803	0.0811804	0.00874292	0.00545142	0.000821746	0.000517869
Endine, Lago de	Central Europe	Weber et al. (2018)	45.7794	9.93976	9.4	2.1	10.1068	10.0792	19.4084	18.5193	120.951	6.82627					0.166348	0.092797	0.0246077	0.159015	0.156547	0.110627	0.0519823	0.0139421	0.00229478	0.0954855	0.102866	0.0106424	0.00963692	0.00223413	0.000973764
Engstlensee	Central Europe	Weber et al. (2018)	46.7735	8.35667	45	0.44	2.61369	6.77693	10.7608	10.0779	47.4385	6.0206	161.833	8.23167	8.36667	7.8	0.103638	0.0357338	0.00784955	0.100631	0.109105	0.0454607	0.0534427	0.00490361	0.00567433	0.255338	0.227561	0.0170383	0.0201595	0.00409797	0.00936568
Fälensee	Central Europe	Weber et al. (2018)	47.2511	9.41686	24	0.12	4.57465	7.88215	12.8954	12.287	63.0572	6.23144					0.0703459	0.0181304	0.00297565	0.176713	0.0796454	0.0453855	0.0328255	0.00238221	0.00141148	0.388549	0.153699	0.0155604	0.00991318	0.00112024	0.00134293
Garlate, Lake	Central Europe	Weber et al. (2018)	45.8188	9.41106	34	4.64	10.7835	10.757	20.181	19.2816	129.084	6.89904					0.113228	0.0547083	0.0108456	0.162348	0.182637	0.0864823	0.0743057	0.00696458	0.00601838	0.137782	0.134614	0.0124314	0.014868	0.00112815	0.00163848
Gerzensee	Central Europe	Weber et al. (2018)	46.8304	7.5471	10	0.27	8.78799	8.75836	17.9025	17.0336	105.1	6.68447	481.757	7.75427	6.95015	2.27231	0.152689	0.0538872	0.0155388	0.192559	0.194236	0.0764319	0.0376493	0.00718169	0.00173143	0.127373	0.121606	0.0097561	0.00759742	0.00110162	0.000661911
Greifensee	Central Europe	Weber et al. (2018)	47.3525	8.67738	32	8.6	9.52891	9.50042	18.7485	17.8682	114.005	6.76414	485.21	7.89964	6.53822	2.51803	0.117923	0.0502884	0.0121983	0.129031	0.163159	0.0659914	0.0667704	0.00498802	0.00379962	0.165532	0.192994	0.00810184	0.0167606	0.00104955	0.0014138
Ghirla, Lago di	Central Europe	Weber et al. (2018)	45.9161	8.82235	14	0.28	9.57336	9.54494	18.7992	17.9183	114.539	6.76892					0.188688	0.0546737	0.0134421	0.212802	0.130935	0.0560644	0.049977	0.0071597	0.00262761	0.16611	0.0986016	0.00678191	0.0099629	0.00110798	0.00106769
Glattalpsee	Central Europe	Weber et al. (2018)	46.9197	8.90404	23	0.39	2.63345	6.79855	10.7823	10.1002	47.5898	6.02272					0.0811118	0.0811118	0.012205	0.0943765	0.115541	0.0712835	0.0710415	0.00360058	0.00506847	0.288954	0.15172	0.00971131	0.00827119	0.00214761	0.00385573
Grimselsee	Central Europe	Weber et al. (2018)	46.5662	8.30374	100	2.7	2.36178	7.55661	10.4865	9.79413	45.3396	5.99351					0.360588	0.0197298	0.00791238	0.324505	0.0513488	0.0129962	0.00339868	0.00491382	0	0.164687	0.0353269	0.00432704	0.00704018	0.00322626	0
Hinterburgsee	Central Europe	Weber et al. (2018)	46.7181	8.06752	11.5	0.047687	4.23877	7.52644	12.5298	11.9086	60.2116	6.19533	243.25	7.72	4.96672	0.0001	0.110649	0.0255458	0.00356045	0.149355	0.146202	0.0495915	0.0564937	0.00385255	0.00185066	0.256699	0.164152	0.00984833	0.0184265	0.00156663	0.00220731
Hinterer Schwendisee	Central Europe	Weber et al. (2018)	47.1872	9.33128	4	0.012233	6.03179	8.54303	14.7554	13.9286	76.8873	6.38812					0.153042	0.0270051	0.00496254	0.245508	0.127316	0.0413386	0.0431877	0.0030727	0.00173901	0.196661	0.13477	0.00581311	0.0135794	0.000558975	0.00144602
Iffigsee	Central Europe	Weber et al. (2018)	46.3865	7.40602	24	0.112072	1.55171	6.68494	9.60471	8.88155	40.1097	5.90641	133.5	8.01	10.75		0.0670891	0.0216751	0.00590293	0.0871597	0.106143	0.0342799	0.0503643	0.0028456	0.00404902	0.329021	0.244499	0.020397	0.0168815	0.00265454	0.00703808
Klöntalersee	Central Europe	Weber et al. (2018)	47.0254	8.97797	46	3.29	7.57783	8.31874	16.5207	15.6702	91.5062	6.55435		7.91886	8.64318	6.35	0.114829	0.0582656	0.014001	0.138015	0.121113	0.0734322	0.0603624	0.00729399	0.00645421	0.159328	0.199787	0.0162865	0.0209946	0.00418628	0.00565148
Ledro, Lago di	Central Europe	Weber et al. (2018)	45.8768	10.7519	47	2.187	8.53114	8.50112	17.6092	16.7442	102.013	6.65685					0.0860389	0.0383505	0.00687054	0.10593	0.177913	0.0603996	0.0683258	0.00372734	0.00472884	0.200632	0.215224	0.00995523	0.0175996	0.00140859	0.00289636
Lungerensee	Central Europe	Weber et al. (2018)	46.8006	8.16119	68	2.01	8.3385	8.30819	17.3892	16.5272	99.6982	6.63614	262.75	8.225	8.51667	7.3	0.112442	0.0647091	0.0160928	0.14158	0.124066	0.084369	0.0675842	0.00729153	0.00702633	0.161677	0.167795	0.0139785	0.0224383	0.00401626	0.004933
Lugano, Lago di	Central Europe	Weber et al. (2018)	45.9881	8.97276	286	48.7	10.4229	10.3958	19.7693	18.8754	124.75	6.86027	250.685	8.02179	5.00573	0.0625439	0.0750949	0.0280324	0.0059903	0.0833506	0.112914	0.0433093	0.0452672	0.00311716	0.0036123	0.177636	0.396797	0.0111782	0.0103935	0.00111845	0.00218924
Lauerzersee	Central Europe	Weber et al. (2018)	47.033	8.60243	13	3.1	9.55361	9.52515	18.7767	17.8961	114.302	6.76679	297.092	7.85011	6.62348	3.26844	0.143052	0.0678237	0	0.172833	0.141232	0.0839546	0.0488582	0	0	0.180908	0.14095	0.0110451	0.00934285	0	0
Mognola, Lago di	Central Europe	Weber et al. (2018)	46.4304	8.68857	30		1.85796	7.01447	9.93808	9.22655	42.0868	5.93934					0.0939285	0.0199011	0.00934384	0.188491	0.0774312	0.0466336	0.00527615	0.0104712	0	0.466442	0.0700916	0.00813893	0.00185481	0.00199656	0
Neuenburgersee	Central Europe	Weber et al. (2018)	46.8959	6.84781	152	217.9	9.61782	9.58946	18.85	17.9684	115.074	6.7737	300.646	8.18565	10.2807	9.726	0.0849866	0.0335759	0.00829178	0.0988065	0.132319	0.0677735	0.0459293	0.00636203	0.0037792	0.202532	0.281003	0.0150687	0.0134824	0.00260039	0.00348955
Oeschinensee	Central Europe	Weber et al. (2018)	46.4983	7.72638	56	1.1	3.95722	8.24662	12.2233	11.5915	57.7263	6.16506					0.0749901	0.0563532	0.0119644	0.087799	0.141836	0.0780189	0.0981941	0.00500057	0.00979684	0.170068	0.211893	0.0153007	0.0261221	0.00409164	0.00857111
Poschiavo, Lago di	Central Europe	Weber et al. (2018)	46.282	10.0907	85		7.00486	9.57789	15.8664	15.0248	86.201	6.49274					0.154292	0.026751	0.00710326	0.197347	0.0803058	0.0352799	0.0248212	0.00445523	0.00122547	0.300244	0.147263	0.0091337	0.00897536	0.00130492	0.00149769
Ritom, Lago	Central Europe	Weber et al. (2018)	46.5402	8.68895	69	1.49	2.59888	6.76072	10.7446	10.0612	47.3251	6.019					0.267589	0.0354431	0.00997499	0.280791	0.0814312	0.0275807	0.0181776	0.00547609	0.00153491	0.157426	0.096484	0.00588683	0.00694702	0.00258126	0.00267593
Rotsee	Central Europe	Weber et al. (2018)	47.0703	8.31469	16	0.48	9.64746	9.61915	18.8838	18.0018	115.43	6.77688	281.225	7.8903	6.64245	2.7988	0.1466	0.0492241	0.0112734	0.172468	0.191427	0.0573467	0.0453269	0.0052289	0.00222733	0.163174	0.138241	0.00804117	0.00781648	0.000754536	0.000849934
Silsersee	Central Europe	Weber et al. (2018)	46.42	9.73267	29		2.87054	7.0579	11.0404	10.3673	49.4053	6.04821		7.17	9.8	9.8	0.0951583	0.0205592	0.0105259	0.114319	0.0915365	0.0344108	0.0164183	0.0106568	0.00150042	0.406487	0.171347	0.00877346	0.013466	0.00311108	0.00173057
Soppensee	Central Europe	Weber et al. (2018)	47.0902	8.08095	25	0.24	8.80775	8.77815	17.925	17.0558	105.338	6.6866	382.089	7.76497	7.21914	2.4	0.159829	0.0513464	0.0111647	0.184531	0.137377	0.0777195	0.0405101	0.00593821	0.00162154	0.189424	0.119107	0.0101823	0.00946927	0.00108895	0.000690173
Silvaplana, Lago de	Central Europe	Weber et al. (2018)	46.4491	9.79386	78	2.87	2.915	7.10653	11.0887	10.4174	49.7457	6.05299					0.137275	0.028803	0.00797817	0.183334	0.102196	0.0377563	0.0254976	0.00537758	0.00190951	0.294214	0.153717	0.0102427	0.00787874	0.00175624	0.00206272
Thunersee	Central Europe	Weber et al. (2018)	46.6907	7.72255	215	47.69	9.00039	8.97109	18.145	17.2728	107.653	6.70731	276.142	8.03259	9.4081	8.33393	0.117023	0.07425	0.017521	0.131261	0.128705	0.0952493	0.0783323	0.0080764	0.00774755	0.132512	0.161584	0.0135239	0.0243666	0.00440616	0.00544153
Trüebsee	Central Europe	Weber et al. (2018)	46.794	8.39009	6.5	0.3	3.03355	7.23621	11.2178	10.5509	50.6535	6.06574	108.445	8.75	11.35	11.3	0.13597	0.0239421	0.0107374	0.131583	0.108898	0.0321127	0.0469919	0.00485467	0.00542328	0.223773	0.220971	0.0224371	0.0191255	0.00715555	0.00602465
Vierwaldstättersee	Central Europe	Weber et al. (2018)	47.0138	8.43289	111.5	113.72	8.80281	8.77321	17.9194	17.0502	105.278	6.68606	218.977	7.95937	9.00566	6.95731	0.076738	0.0248575	0.00584299	0.0859628	0.111638	0.0384805	0.0318709	0.00325977	0.00227465	0.262514	0.324679	0.0155849	0.0115496	0.00250236	0.00224431
Zürichsee	Central Europe	Weber et al. (2018)	47.2263	8.73783	135	88.66	9.75612	9.72798	19.0079	18.1242	116.736	6.78857	290.717	7.86132	6.18663	2.05284	0.101614	0.0343999	0.0068237	0.105032	0.166217	0.0422652	0.0817299	0.00318989	0.00314254	0.197087	0.219884	0.00800817	0.0273237	0.00138053	0.00190256
Namtso avg	China	Dang et al. (2018)	30.75	90.55	94.5	2002	-0.2	6.34026	9.61952	8.97319	38.0416	7.79794	1710.3	9.5	6.45		0.04	0.02	0.02	0.03	0.095	0.02	0.15	0	0.125	0.045	0.29	0.01	0.08	0	0.075
Lake Hulun	China	Dang et al. (2018)	48.95	117.39		2036	1	12.6714	21.6	20	88.7	15.9645					0.151515	0.0707071	0.010101	0.0909091	0.282828	0.040404	0.10101	0	0.010101	0.0606061	0.171717	0	0.010101	0	0
Lake Qinghai avg	China	Dang et al. (2018)	36.795	100.31		4282	1.8	8.15556	13.1841	12.1846	57.089	8.97764		9.05			0.227723	0.0643564	0.00990099	0.0891089	0.217822	0.039604	0.0544554	0.00990099	0.0049505	0.0742574	0.193069	0.00990099	0.0049505	0	0
Longquanlongwan a	China	Dang et al. (2018)	42.42	126.6		0.62	3.2	13.2571	20.8	19.2	92.8	13.8843		7.8			0.3	0.09	0.01	0.19	0.18	0.05	0.06	0.01	0	0.04	0.06	0	0.01	0	0
Nanlongwan a	China	Dang et al. (2018)	42.41	126.48		0.23	3.2	13.2571	20.8	19.2	92.8	13.8843		8			0.193878	0.102041	0.0204082	0.204082	0.173469	0.0612245	0.0714286	0.0102041	0	0.0816327	0.0714286	0	0.0102041	0	0
Erlongwan a	China	Dang et al. (2018)	42.3	126.38		0.27	4.2	14.2357	21.65	20.1333	99.65	13.8379		7.8			0.343434	0.0707071	0.010101	0.252525	0.151515	0.030303	0.030303	0.010101	0	0.0505051	0.0505051	0	0	0	0
Dalongwan a	China	Dang et al. (2018)	42.34	126.39		0.83	4.2	14.2357	21.65	20.1333	99.65	13.8379		8			0.212121	0.0808081	0.010101	0.262626	0.161616	0.0606061	0.040404	0	0	0.0808081	0.0808081	0	0.010101	0	0
Daihai avg	China	Dang et al. (2018)	40.58	112.66	7.9	50.7	4.9	13.812	20.473	19.2008	96.684	12.3687	15646.7	9	7.5		0.130872	0.16443	0.057047	0.090604	0.177852	0.0805369	0.0939597	0.0134228	0	0.0536913	0.114094	0.0100671	0.0100671	0.0033557	0
Lake Chagan	China	Dang et al. (2018)	45.21	124.33	5.6	253	5.3	15.9999	23.644	22.2231	111.999	14.6824	484.7	8.3	9.1		0.14	0.08	0.01	0.11	0.28	0.05	0.09	0.01	0	0.07	0.14	0.01	0.01	0	0
Wuliangsuhai	China	Dang et al. (2018)	40.87	108.78	2.4	48.2	6.1	15.4766	22.6928	21.3055	108.336	13.0385	4273.3	8.7	10.8		0.151515	0.0606061	0	0.0606061	0.292929	0.040404	0.121212	0	0	0.0606061	0.181818	0.010101	0.020202	0	0
Lake Wolong	China	Dang et al. (2018)	42.75	123.29	1.9	18.7	6.7	16.6572	23.7422	22.4075	116.6	13.6976	1341	8.3	5.9		0.148515	0.0693069	0.00990099	0.178218	0.247525	0.039604	0.0693069	0	0	0.0891089	0.138614	0	0.00990099	0	0
Cetian	China	Dang et al. (2018)	39.97	113.77	4.5	17	7	13.7365	22.0587	20.8557	109.892	12.036	3145	9.3	6.7		0.15	0.07	0.01	0.12	0.26	0.06	0.08	0.01	0.01	0.1	0.11	0.01	0.01	0	0
Lake zhenzhu	China	Dang et al. (2018)	41.74	122.86	1.4	5.11	8.3	13.7865	24.3531	23.1121	124.079	12.8674	494	9.2			0.19	0.1	0.02	0.17	0.25	0.06	0.04	0.01	0	0.08	0.08	0	0	0	0
Guanting	China	Dang et al. (2018)	40.37	115.76	7.3	52.6	9.5	14.5276	24.401	23.218	130.749	11.8642	1465.5	8.5	7.6		0.13	0.08	0.01	0.14	0.23	0.09	0.07	0.01	0	0.1	0.12	0.01	0.01	0	0
Yuqiao	China	Dang et al. (2018)	40.03	117.52	5.5	60.8	10.9	15.9606	25.5757	24.4929	143.646	11.8521	511.7	9.5	16.9		0.18	0.1	0.01	0.15	0.21	0.08	0.06	0.01	0	0.08	0.1	0.01	0.01	0	0
Xidayang	China	Dang et al. (2018)	38.75	114.77	1.5	27.6	12.1	17.5778	26.8	25.8333	158.2	11.2227	453.5	8.1	8.2		0.204082	0.102041	0.0102041	0.112245	0.265306	0.0510204	0.0918367	0	0	0.0408163	0.0918367	0.0102041	0.0204082	0	0
Baiyangdian	China	Dang et al. (2018)	38.93	115.99	2.2	0.11	12.6	17.8889	27.2	26.05	161	11.6673	899	8.2	8.9		0.22	0.12	0.02	0.16	0.18	0.08	0.06	0.01	0	0.05	0.08	0.01	0.01	0	0
Lake Hengshui	China	Dang et al. (2018)	37.63	115.62	4.7	16.4	12.7	17.7716	26.8232	25.9581	159.945	11.0507	1184	8.6	9.2		0.20202	0.10101	0.010101	0.151515	0.191919	0.0707071	0.0707071	0	0	0.0707071	0.10101	0.010101	0.020202	0	0
Lake Dongping	China	Dang et al. (2018)	35.96	116.2	3.2	117	13.2	17.3219	26.172	25.3397	155.897	10.5973	744	8.8	9.4		0.181818	0.131313	0.020202	0.171717	0.161616	0.121212	0.0505051	0.010101	0	0.0606061	0.0707071	0.010101	0.010101	0	0
Fenghe b	China	Dang et al. (2018)	34.33	108.74			13.5	14.9009	26.7459	25.7068	163.91	9.8339		8.3			0.20202	0.121212	0.020202	0.121212	0.191919	0.0606061	0.10101	0.010101	0.010101	0.040404	0.10101	0.010101	0.010101	0	0
Lake Dushan	China	Dang et al. (2018)	35.08	116.77	2.4	53.4	13.7	13.7				10.0036	1324	8.6	7.8	7.8	0.2	0.11	0.02	0.15	0.19	0.09	0.06	0.01	0	0.06	0.09	0.01	0.01	0	0
Lake Luoma	China	Dang et al. (2018)	34.07	118.16	3.2	222	13.8	13.8				9.56865	481	8.5	9.3	9.3	0.19802	0.0990099	0.00990099	0.128713	0.227723	0.0792079	0.0792079	0.00990099	0	0.049505	0.0990099	0.00990099	0.00990099	0	0
Lake Hongze	China	Dang et al. (2018)	33.31	118.75	2.5	1000	14	14	26.9169	25.7438	170.595	9.60806	446	8.4	9.2	9.2	0.17	0.16	0.04	0.13	0.11	0.1	0.12	0.01	0.02	0.05	0.06	0.01	0.02	0	0
Lake Weishan	China	Dang et al. (2018)	34.61	117.26	1.9	112	14.6	14.6	27.1937	26.2797	174.241	9.8701	1256	8.2	9	9	0.20202	0.121212	0.020202	0.181818	0.151515	0.111111	0.0505051	0.010101	0	0.0606061	0.0707071	0.010101	0.010101	0	0
Lake Gaoyou	China	Dang et al. (2018)	32.82	119.35	2	380	14.9	14.9	27.4573	26.1353	178.438	9.38996	441	8.7	9.7	9.7	0.191919	0.151515	0.030303	0.151515	0.121212	0.10101	0.10101	0.010101	0.010101	0.0505051	0.0606061	0.010101	0.010101	0	0
Lake Changdang	China	Dang et al. (2018)	31.63	119.57	1.4	73	15.7	15.7	28.3136	26.7587	187.35	9.17137	459	8.3	10	10	0.212121	0.151515	0.030303	0.191919	0.121212	0.121212	0.040404	0.010101	0	0.0505051	0.0505051	0.010101	0.010101	0	0
Lake Shijiu	China	Dang et al. (2018)	31.5	118.94	3.3	173	15.9	15.9	28.4447	27.001	189.594	9.2465	216.2	8.8	8.9	8.9	0.207921	0.148515	0.029703	0.168317	0.138614	0.108911	0.049505	0.00990099	0	0.049505	0.0693069	0.00990099	0.00990099	0	0
Lake Yangcheng	China	Dang et al. (2018)	31.43	120.8	1.9	65.9	15.9	15.9	27.9512	26.44	189.183	8.90411	681	8.4	8.7	8.7	0.21	0.14	0.02	0.19	0.12	0.12	0.05	0.01	0	0.06	0.06	0.01	0.01	0	0
Lake Chang	China	Dang et al. (2018)	30.44	112.45	3.5	112	16	16	28.0764	27.003	197.808	8.72052	393	8.6	9.3	9.3	0.18	0.14	0.03	0.14	0.18	0.11	0.08	0.01	0	0.05	0.06	0.01	0.01	0	0
Lake Caizi	China	Dang et al. (2018)	30.79	117.1	3.3	96	16.1	16.1	27.7127	26.325	192.414	8.71282	166.5	8.6	8.9	8.9	0.262626	0.151515	0.020202	0.191919	0.131313	0.0909091	0.040404	0.010101	0	0.0505051	0.040404	0.010101	0	0	0
Lake Chao	China	Dang et al. (2018)	31.57	117.67	4.2	792	16.2	16.2	28.5957	27.2421	193.608	9.27729	288	8.7	8.8	8.8	0.22	0.16	0.03	0.19	0.1	0.11	0.06	0.01	0.01	0.05	0.04	0.01	0.01	0	0
Lake Hong	China	Dang et al. (2018)	29.9	113.4	2.8	234	16.6	16.6	30.7285	29.514	227.378	8.82181	330	8.7	8.9	8.9	0.212121	0.131313	0.020202	0.141414	0.161616	0.111111	0.0606061	0.010101	0	0.0505051	0.0808081	0.010101	0.010101	0	0
Lake Wuchang	China	Dang et al. (2018)	30.27	116.69	3.5	41.3	16.9	16.9	28.9245	27.5748	201.645	9.01946	117.4	8.3	8.7	8.7	0.252525	0.181818	0.030303	0.181818	0.10101	0.111111	0.0505051	0.010101	0	0.040404	0.030303	0.010101	0	0	0
Lake Liangzi	China	Dang et al. (2018)	30.23	114.6	3	229	17	17	29.0812	27.7954	202.594	9.07875	201.5	8.7	8.8	8.8	0.22	0.16	0.03	0.18	0.12	0.11	0.05	0.01	0	0.06	0.04	0.01	0.01	0	0
Lake Longgan	China	Dang et al. (2018)	29.92	116.11	3.2	260	17.2	17.2	29.3875	27.9586	204.963	9.03436	252	8.6	8.7	8.7	0.26	0.16	0.03	0.17	0.11	0.09	0.06	0.01	0.01	0.04	0.04	0.01	0.01	0	0
Gonghai	China	Cao et al. (2020)	38.9	112.23			4.3	12.1				10.69		8.44			0.0836044	0.0460723	0.00803755	0.132878	0.186779	0.0815226	0.0633311	0.00578124	0.00364116	0.182184	0.172733	0.0170848	0.013225	0.00190139	0.00122503
Ximenglongtan	China	Ning et al. (2019)	22.64	99.6			15.6	15.6		17.8	187.2	3.64578					0.4355	0.0772	0.0131	0.1735	0.1297	0.0432	0.0378	0.0058	0.002	0.0502	0.0234	0.0042	0.0029	0.001	0.0005
Donghu	China	Qian et al. (2019)	30.91	114.07			16	16			192	9.00185		8.5			0.210235	0.149612	0.0256521	0.168473	0.124395	0.114849	0.0591673	0.0147527	0.00344731	0.0587843	0.0513278	0.0093108	0.00765114	0.00161301	0.000729699
