# Supplementary material for: Revised fractional abundances and warm-season temperatures substantially improve brGDGT calibrations in lake sediments
Source: Copernicus journal article supplement (doi:10.5194/bg-2021-16), 2021-01-28
Supplement: Supplementary file 3 [file bg-2021-16-supplement.zip]

Supplement (part 1 of 2)

S1 Comparison of ASE and BD Methods

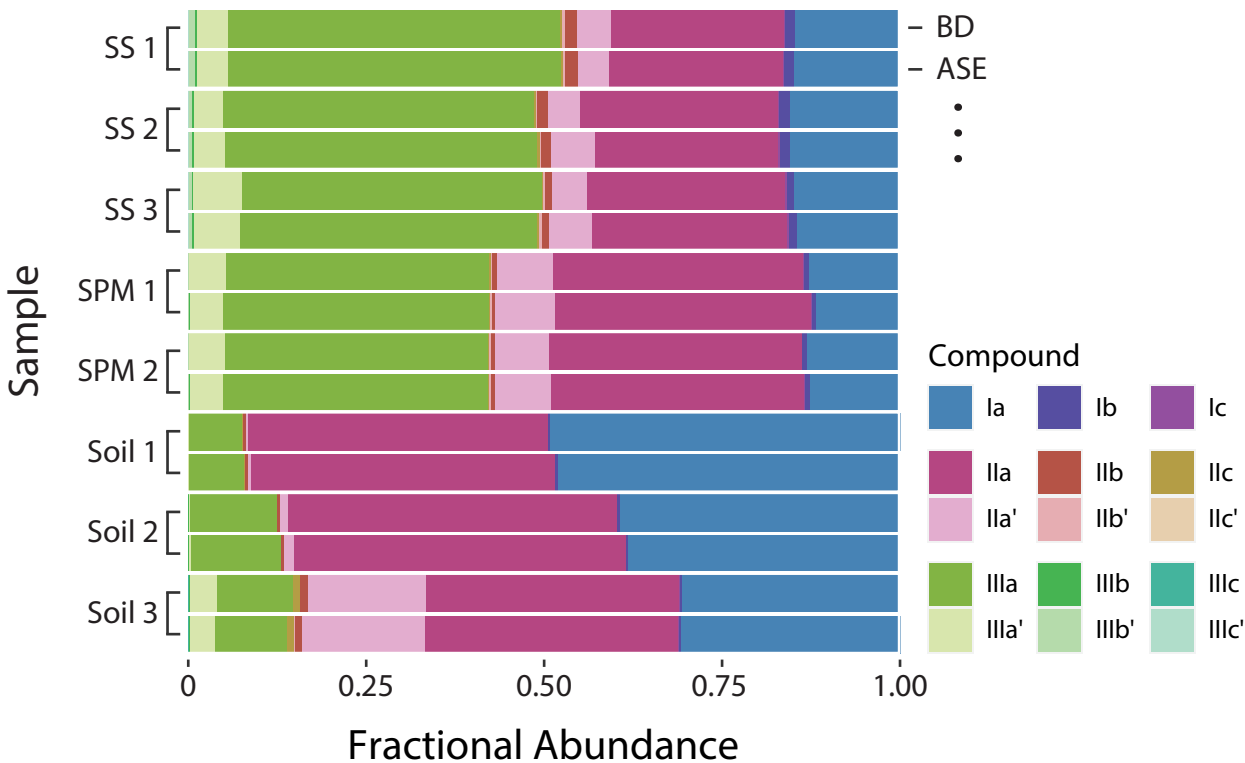

Figure S1. Comparison of fractional abundances (Full set) obtained using the Bligh and Dyer (BD; top of each pair) and accelerated solvent extractor (ASE; bottom of each pair) extraction methods. “SS” = Surface Sediment; “SPM” = Suspended Particulate Matter.

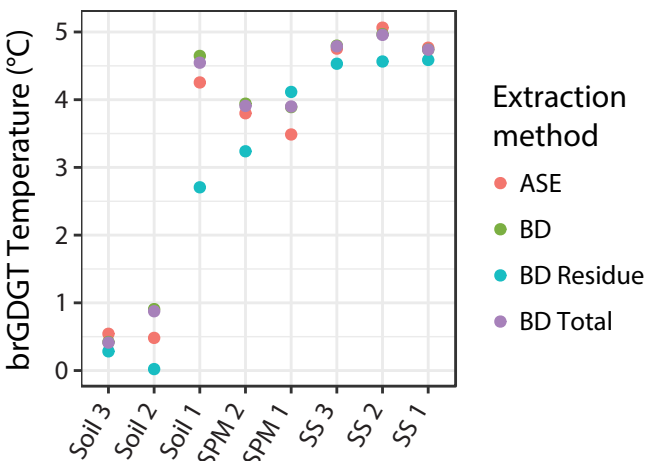

Figure S2. Comparison of brGDGT-derived temperatures obtained from samples extracted with the accelerated solvent extractor (ASE) and Bligh and Dyer (BD) extraction methods. The BD sample residue re-extracted with ASE (“BD Residue”) and the sum of the BD and BD Residue samples (“BD Total”) are additionally shown. Mean annual temperature for soil and lake samples were calculated using the Russell et al. (2018) and Naafs et al. (2017) MBT<sub>5Me</sub> calibrations, respectively. “SS” = Surface Sediment; “SPM” = Suspended Particulate Matter.

## S2 Comparison of WorldClim and logger temperatures

WorldClim- and iButton-derived climate normals were within one standard deviation for all months except June and July, for which the *in situ* logger temperatures were  $1.0 \pm 0.7$  °C and  $1.3 \pm 1.0$  °C higher, respectively. These warmer summer temperatures were most pronounced for sites sitting within deep glacial valleys, where high (> 100m) exposed rock walls may make them susceptible to warmer summer microclimates.

## S3 Meth and MC Subset Variations

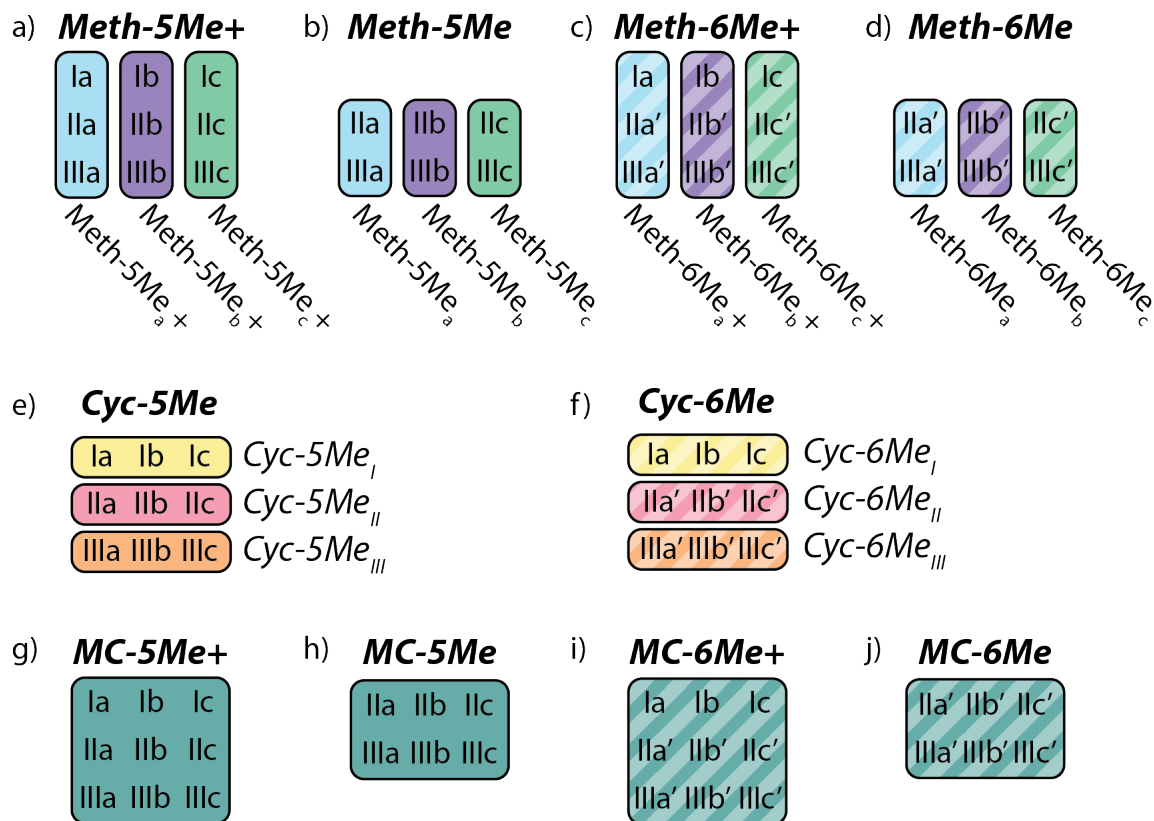

Figure S3. Structural subsets within the Meth (a-d), Cyc (e-f), and Meth-Cyc (MC; g-j) sets. Variations on the Meth and MC subsets that include (a, c, e, g) or exclude (b, d, f, h) tetramethylated compounds are shown. The complete Meth set (Fig. 2a) is composed of the Meth-5Me+ (a) and Meth-6Me (d) subsets. The complete MC set shown in (Fig. 2f) is composed of the MC-5Me+ (e) and MC-6Me (h) subsets.

Plots of the structural subset variations against MAF are additionally provided in the supplement\_pt2.html file (Figs. S4-11).

## S4 Structural Set Plots

Plots of all structural sets against MAF, conductivity, pH, and  $DO_{mean}$  are provided in the supplement\_pt2.html file (Figs. S11-40).

## S5 Calibration Results

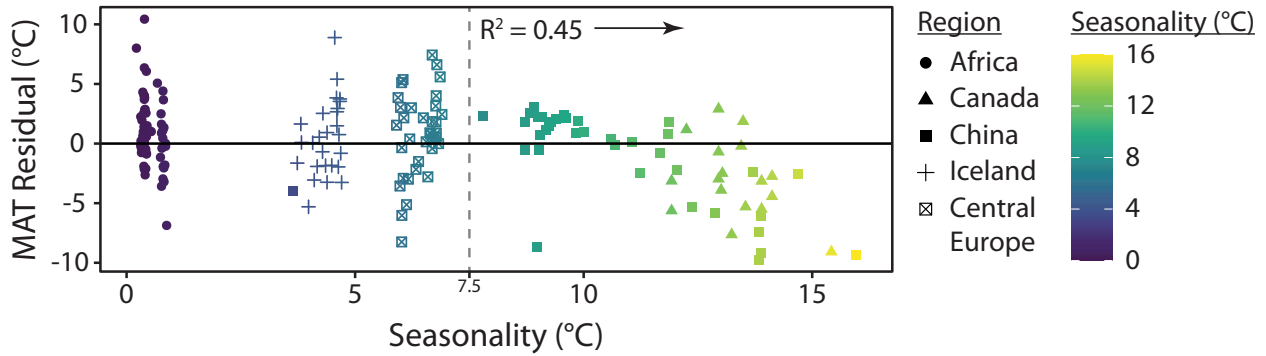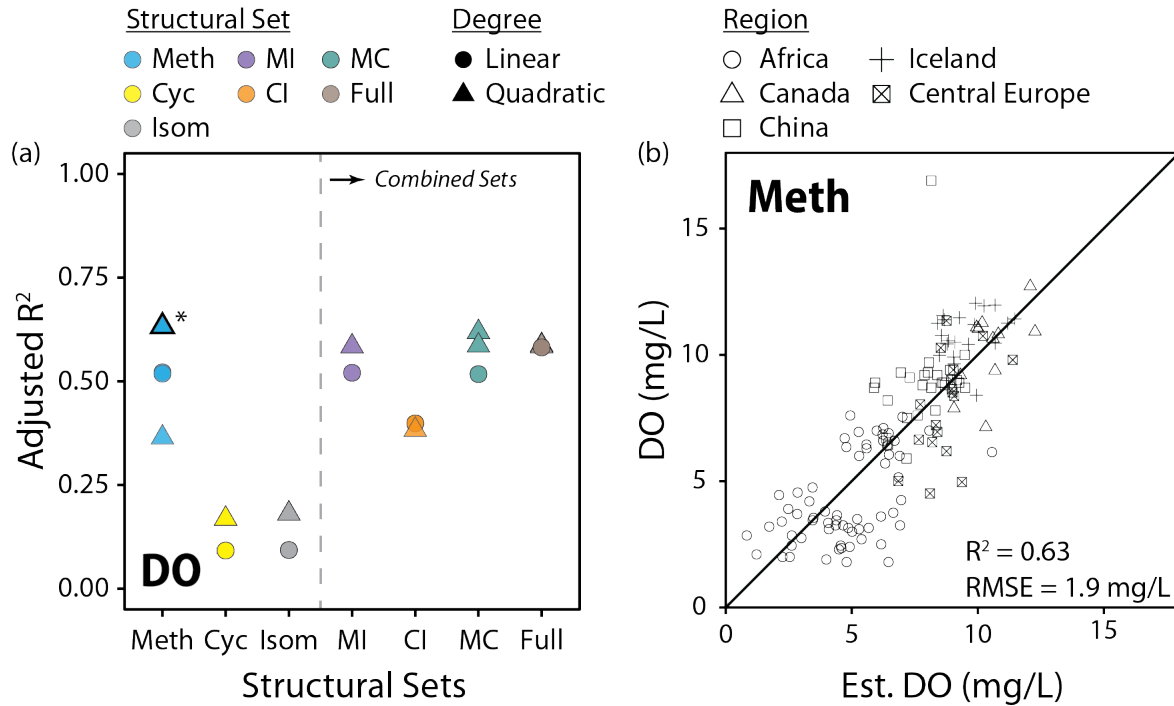

| Env. Variable             | Subset              | Adj. R <sup>2</sup> | RMSE <sup>a</sup> | Variables | Compounds |
|---------------------------|---------------------|---------------------|-------------------|-----------|-----------|
| MAF (°C)                  | <b>Full</b>         | <b>0.91</b>         | <b>1.97</b>       | <b>6</b>  | <b>15</b> |
|                           | MC                  | 0.91                | 1.99              | 4         | 15        |
|                           | MI                  | 0.90                | 2.14              | 4         | 15        |
|                           | <b>Meth</b>         | <b>0.90</b>         | <b>2.14</b>       | <b>8</b>  | <b>9</b>  |
|                           | MI <sub>a</sub>     | 0.90                | 2.18              | 4         | 5         |
|                           | MBT' <sub>5Me</sub> | 0.89                | 2.32              | 1         | 7         |
|                           | Meth <sub>a</sub>   | 0.88                | 2.33              | 3         | 3         |
|                           | Meth <sub>b</sub>   | 0.79                | 3.10              | 5         | 5         |
|                           | Meth <sub>c</sub>   | 0.74                | 3.32              | 4         | 5         |
| MST (°C)                  | Full                | 0.90                | 2.44              | 8         | 15        |
| SWI (°C)                  | MC                  | 0.89                | 30.13             | 6         | 15        |
| WMT (°C)                  | Full                | 0.88                | 2.70              | 8         | 15        |
| MAT (°C)                  | MI                  | 0.87                | 3.44              | 9         | 15        |
| ln(Conductivity)          | <b>CI</b>           | <b>0.83</b>         | <b>0.66</b>       | <b>7</b>  | <b>15</b> |
|                           | MC                  | 0.83                | 0.65              | 12        | 15        |
|                           | Full                | 0.81                | 0.69              | 8         | 15        |
|                           | MI                  | 0.80                | 0.70              | 7         | 15        |
|                           | Isom                | 0.76                | 0.78              | 6         | 8         |
|                           | CI <sub>III</sub>   | 0.75                | 0.80              | 3         | 6         |
|                           | CI <sub>II</sub>    | 0.73                | 0.84              | 4         | 6         |
|                           | IR <sub>6Me</sub>   | 0.66                | 0.95              | 1         | 12        |
|                           | CI <sub>I</sub>     | 0.65                | 0.95              | 4         | 3         |
| pH                        | Full                | 0.74                | 0.55              | 8         | 15        |
|                           | <b>CI</b>           | <b>0.73</b>         | <b>0.57</b>       | <b>2</b>  | <b>9</b>  |
|                           | CI <sub>II</sub>    | 0.68                | 0.62              | 3         | 6         |
|                           | CBT                 | 0.64                | 0.66              | 1         | 6         |
|                           | CI <sub>III</sub>   | 0.62                | 0.67              | 2         | 6         |
|                           | CI <sub>I</sub>     | 0.60                | 0.69              | 1         | 3         |
| DO <sub>mean</sub> (mg/L) | Meth                | 0.63                | 1.86              | 8         | 15        |
| ln(Surface Area/Depth)    | Full                | 0.59                | 2.26              | 7         | 15        |
| ln(Volume)                | Full                | 0.55                | 2.55              | 10        | 15        |
| DO <sub>min</sub> (mg/L)  | Cyc <sub>III</sub>  | 0.55                | 2.43              | 3         | 6         |
| ln(Depth)                 | MI                  | 0.35                | 1.02              | 6         | 15        |

Table S1. Summary of calibrations for all environmental variables (Env. Variable). “Variables” is the number of fitting variables used in each calibration. “Compounds” is the total number of compounds used in each calibration, including all those employed in fractional abundance calculations. Recommended fits are emphasized in bold. aRMSE units are indicated in the “Env. Variable” column.

In addition to those in the main text, we provide equations for the subset-specific Meth<sub>a</sub>, Meth<sub>b</sub>, and Meth<sub>c</sub> MAF fits:

$$MAF (^{\circ}C) = 26.56(\pm 0.52) - 34.67(\pm 5.14) \times fIIa_{Meth}^2 + 29.4(\pm 7.46) \times fIIIa_{Meth}^2 - 49.43(\pm 4.92) \times fIIIa_{Meth} \quad (n = 182, R^2 = 0.88, RMSE = 2.33^{\circ}C) \quad (S1)$$

$$MAF (^{\circ}C) = 79.72(\pm 21.83) + 103.96(\pm 19.08) \times fIb_{Meth}^2 - 147.29(\pm 40.62) \times fIb_{Meth} - 80.14(\pm 23.81) \times fIIb_{Meth}^2 - 7.19(\pm 1.98) \times fIIIb_{Meth}^2 - 89.73(\pm 26.54) \times fIIIb_{Meth} \quad (n = 182, R^2 = 0.79, RMSE = 3.10^{\circ}C) \quad (S2)$$

$$MAF (^{\circ}C) = 9.38(\pm 1.97) + 19.92(\pm 2.41) \times fIc_{Meth}^2 - 8.44(\pm 2.89) \times fIIc_{Meth} + 18.83(\pm 5) \times fIIIc_{Meth}^2 - 18.4(\pm 3.32) \times fIIIc'_{Meth} \quad (n = 157, R^2 = 0.74, RMSE = 3.32^{\circ}C) \quad (S3)$$

We also provide the subset-specific CI<sub>I</sub>, CI<sub>II</sub>, and CI<sub>III</sub> fits for conductivity,

$$\ln(Cond.) = -20.07(\pm 4.33) + 22.13(\pm 4.34) \times fIa_{CI}^2 - 61(\pm 10.22) \times fIb_{CI}^2 + 73.24(\pm 10.93) \times fIb_{CI} + 123.55(\pm 26.57) \times fIc_{CI}^2 \quad (n = 143, R^2 = 0.65, RMSE = 0.95) \quad (S4)$$

$$\ln(Cond.) = 7.11(\pm 0.82) + 5.17(\pm 1.97) \times fIIa_{CI}^2 - 9.42(\pm 2.25) \times fIIa_{CI} - 38.77(\pm 14.13) \times fIIb_{CI}^2 + 14.36(\pm 4.83) \times fIIb'_{CI} \quad (n = 143, R^2 = 0.73, RMSE = 0.84) \quad (S5)$$

$$\ln(Cond.) = 7.46(\pm 0.24) - 5.28(\pm 0.32) \times fIIIa_{CI} - 268.59(\pm 82.68) \times fIIIb_{CI}^2 + 31.22(\pm 7.74) \times fIIIb_{CI} \quad (n = 143, R^2 = 0.75, RMSE = 0.80) \quad (S6)$$

and for pH,

$$pH = 5.96(\pm 0.12) + 7.68(\pm 0.5) \times fIb_{CI} \quad (n = 154, R^2 = 0.60, RMSE = 0.69) \quad (S7)$$

$$pH = 8.31(\pm 0.25) - 3.37(\pm 0.28) \times fIIa_{CI} - 23.45(\pm 7.59) \times fIIb_{CI}^2 + 10.34(\pm 2.38) \times fIIb_{CI} \quad (n = 154, R^2 = 0.68, RMSE = 0.62) \quad (S8)$$

$$pH = 8.41(\pm 0.13) - 2.84(\pm 0.22) \times fIIIa_{CI}^2 + 7.48(\pm 2.37) \times fIIIb_{CI} \quad (n = 154, R^2 = 0.62, RMSE = 0.67) \quad (S9)$$

Finally, we provide the highest-performing DO<sub>mean</sub> calibration:

$$DO_{mean} (mg/L) = 7.6(\pm 2.32) - 12.03(\pm 2.6) \times fIa_{Meth}^2 - 2.1(\pm 0.74) \times fIc_{Meth}^2 - 28.66(\pm 8.5) \times fIIIa_{Meth}^2 + 31.09(\pm 8.66) \times fIIIa'_{Meth} + 36.85(\pm 8.37) \times fIIIa_{Meth}^2 - 35.89(\pm 7.93) \times fIIIa_{Meth} - 15.29(\pm 3.44) \times fIIIb_{Meth}^2 + 15.82(\pm 2.55) \times fIIIb'_{Meth} \quad (n = 140, R^2 = 0.63, RMSE = 1.86 mg/L) \quad (S10)$$

Other calibration equations are available upon request.
