# Supplementary material for: Revised fractional abundances and warm-season temperatures substantially improve brGDGT calibrations in lake sediments
Source: Copernicus journal article supplement (doi:10.5194/bg-2021-16), 2021-01-28
Supplement: Supplementary file 4 [file bg-2021-16-supplement.zip]

Archive with 2 entries (2 files):
- supplement_pt1.pdf
- supplement_pt2.html
